# Supplementary material
Source: publisher figshare collection journal article supplement (https://gsajournals.figshare.com/ndownloader/files/14929721)
Supplement: Supplementary file 1 [file 14929721]

## Sheet: KEGG_Hypo_higher in Virgins
KEGG pathway analysis for genes repressed by reproductive experience (higher in virgins)--HYPOTHALAMUS
top 30 most significant terms; analysis done with Ensembl_IDs from Supplemental Table 2 lists
Enrichment FDR	Genes in list	Total genes	Functional Category	Genes
2.80745e-09	34	129	KEGG:mmu04728 Dopaminergic synapse	Camk2d Maob Atf2 Calm1 Calm2 Clock Slc6a3 Gnai1 Gnai3 Gnal Gng12 Gng2 Gng4 Gria2 Gria4 Kif5b Kif5c Maoa Prkacb Prkcb Plcb1 Plcb4 Ppp1cb Ppp2cb Ppp3cb Scn1a Slc18a2 Ppp2r3a Akt3 Mapk8 Mapk9 Ppp2r5e Ppp2r2a Ppp2r2b
8.48107e-09	34	137	KEGG:mmu04120 Ubiquitin mediated proteolysis	Ube3c Wwp1 Ube2q2 Xiap Ube4a Itch Nedd4 Skp1a Cdc27 Traf6 Ube2e3 Uba3 Ube2a Ube2b Ube3a Uba6 Klhl9 Cop1 Cul3 Cul1 Ube2k Ube2j1 Ube2d2a Ube2d3 Ube2w Ube2g1 Klhl13 Eloc Trim37 Anapc10 Cul2 Cul4b Cul5 Ube2n
2.40473e-08	34	144	KEGG:mmu04723 Retrograde endocannabinoid signaling	Grm5 Cnr1 Slc17a6 Gabra1 Gabra2 Gabra3 Gabra4 Gabrb2 Gabrb3 Gabrg1 Gabrg2 Gnai1 Gnai3 Gng12 Gng2 Gng4 Gria2 Gria4 mt-Nd1 mt-Nd2 mt-Nd3 mt-Nd4 mt-Nd4l mt-Nd5 mt-Nd6 Prkacb Prkcb Plcb1 Plcb4 Mapk1 Mapk8 Mapk9 Ndufa5 Ndufv2
6.79226e-06	32	163	KEGG:mmu04141 Protein processing in endoplasmic reticulum	Ssr1 Atxn3 Bcl2 Canx Eif2s1 Dnaja1 Hsp90aa1 Eif2ak2 Edem1 Sec23a Skp1a Ufd1 March6 Mapk8 Mapk9 Cul1 Mbtps2 Ero1l Ube2j1 Ube2d2a Ngly1 Ube2d3 Erlec1 Dnajc10 Edem3 Ube2g1 Ssr3 Ero1lb Sec62 Tram1 Svip Sec24a
2.25791e-05	18	66	KEGG:mmu04720 Long-term potentiation	Grm5 Braf Rap1a Rps6ka3 Calm1 Calm2 Camk4 Gria2 Kras Prkacb Prkcb Plcb1 Plcb4 Ppp1cb Ppp3cb Ppp3r1 Mapk1 Rps6ka6
2.46794e-05	25	118	KEGG:mmu04071 Sphingolipid signaling pathway	Asah1 Bcl2 Degs1 Gna13 Gnai1 Gnai3 Kras Pik3r1 Prkcb Plcb1 Plcb4 Ppp2cb Pten Rock2 Acer2 Ppp2r3a Akt3 Mapk1 Mapk8 Mapk9 Ppp2r5e Asah2 Ppp2r2a Ppp2r2b Sgpp1
2.82036e-05	29	152	KEGG:mmu04150 mTOR signaling pathway	Prkaa1 Prkaa2 Atp6v1h Braf Rps6ka3 Atp6v1a Cab39 Fzd3 Igf1 Insr Kras Pik3r1 Prkcb Pten Sgk1 Sos1 Sos2 Fnip1 Akt3 Mios Mapk1 Ulk2 Rnf152 Rragc Rps6ka6 Cab39l Rps6kb1 Atp6v1d Rictor
3.06152e-05	26	129	KEGG:mmu04140 Autophagy	Prkaa1 Prkaa2 Atg5 Bcl2 Bnip3 Rb1cc1 Eif2s1 Hif1a Kras Lamp2 Pik3r1 Prkacb Ppp2cb Pten Rab33b Traf6 Akt3 Mapk1 Mapk8 Mapk9 Ulk2 Rragc Atg10 Atg12 Rps6kb1 Vmp1
3.62355e-05	27	139	KEGG:mmu05012 Parkinson's disease	Atp5c1 Atp5f1 Slc6a3 Gnai1 Gnai3 Gnal mt-Atp6 mt-Atp8 mt-Co1 mt-Co2 mt-Co3 mt-Cytb mt-Nd1 mt-Nd2 mt-Nd3 mt-Nd4 mt-Nd4l mt-Nd5 mt-Nd6 Prkacb Slc18a2 Vdac2 Ube2j1 Ube2g1 Uqcrb Ndufa5 Ndufv2
0.000142989	19	85	KEGG:mmu04012 ErbB signaling pathway	Camk2d Braf Crk Kras Nck1 Nrg3 Pak3 Pik3r1 Prkcb Sos1 Sos2 Pak2 Akt3 Pak7 Map2k4 Mapk1 Mapk8 Mapk9 Rps6kb1
0.00015379	16	64	KEGG:mmu05211 Renal cell carcinoma	Braf Rap1a Cdc42 Crk Hif1a Kras Pak3 Pik3r1 Sos1 Sos2 Pak2 Akt3 Pak7 Mapk1 Eloc Cul2
0.000274171	25	139	KEGG:mmu04910 Insulin signaling pathway	Phkb Rhoq Prkaa1 Prkaa2 Braf Calm1 Calm2 Crk Insr Kras Pde3b Pik3r1 Prkacb Ppargc1a Ppp1cb Prkar2b Sorbs1 Sos1 Sos2 Akt3 Mapk1 Mapk8 Mapk9 Ppp1r3c Rps6kb1
0.000314332	37	251	KEGG:mmu04010 MAPK signaling pathway	Braf Rap1a Rps6ka3 Rasa2 Atf2 Cacna2d1 Cacnb4 Cdc42 Crk Elk4 Fgf12 Fgf13 Fgf14 Gng12 Kras Prkacb Prkcb Ppm1b Ppp3cb Ppp3r1 Rasgrp1 Sos1 Sos2 Taok1 Tgfbr1 Rasa1 Traf6 Pak2 Akt3 Map2k4 Map3k2 Mapk1 Mapk8 Mapk9 Stk3 Rps6ka6 Tab2
0.00037557	34	225	KEGG:mmu04014 Ras signaling pathway	Rap1a Rasa2 Angpt1 Calm1 Calm2 Cdc42 Fgf12 Fgf13 Fgf14 Gng12 Gng2 Gng4 Igf1 Insr Kras Pak3 Pik3r1 Prkacb Prkcb Rasgrp1 Sos1 Sos2 Rasa1 Pak2 Rasal2 Akt3 Pak7 Mapk1 Mapk8 Mapk9 Rab5a Rala Shoc2 Exoc2
0.000430774	130	1302	KEGG:mmu01100 Metabolic pathways	Gapdh Synj1 Aldh6a1 Adi1 Nt5c3 Uap1 Galnt7 Atp6v1h Maob Prps2 Aspa Adk Adss Aldh1a1 Amd1 Asah1 Atp5c1 Atp5f1 Atp6v1a Cd38 Cmas Degs1 Dld Dpm1 Fut9 Gad2 Galnt1 Gfpt1 Ggps1 Gk Hprt Idh1 Ids Nme7 Man2a1 Maoa mt-Atp6 mt-Atp8 mt-Co1 mt-Co2 mt-Co3 mt-Cytb mt-Nd1 mt-Nd2 mt-Nd3 mt-Nd4 mt-Nd4l mt-Nd5 mt-Nd6 Mut Pafah1b1 Pafah1b2 Plcb1 Plcb4 St8sia1 Sms Alg11 Hmgcs1 Hmgcll1 Sucla2 Pank3 Ado Chpt1 Ugp2 Mtmr…
0.000430774	24	137	KEGG:mmu04371 Apelin signaling pathway	Prkaa1 Prkaa2 Calm1 Calm2 Camk4 Gna13 Gnai1 Gnai3 Gng12 Gng2 Gng4 Kras Smad2 Mef2a Pde3b Prkacb Plcb1 Plcb4 Ppargc1a Slc8a1 Tgfbr1 Akt3 Mapk1 Rps6kb1
0.000430774	18	87	KEGG:mmu04914 Progesterone-mediated oocyte maturation	Braf Rps6ka3 Gnai1 Gnai3 Hsp90aa1 Igf1 Kras Pde3b Pik3r1 Prkacb Cdc27 Cpeb2 Akt3 Mapk1 Mapk8 Mapk9 Rps6ka6 Anapc10
0.000430774	50	389	KEGG:mmu05200 Pathways in cancer	Braf Apc Xiap Bcl2 Cdc42 Crk Dcc Fgf12 Fgf13 Fgf14 Fzd3 Gna13 Gnai1 Gnai3 Gng12 Gng2 Gng4 Lpar1 Hdac2 Hhip Hif1a Hsp90aa1 Igf1 Itgav Itgb1 Kras Smad2 Mitf Pik3r1 Prkacb Prkcb Plcb1 Plcb4 Pten Rasgrp1 Rock2 Shh Sos1 Sos2 Tgfbr1 Rarb Traf6 Akt3 Mapk1 Mapk8 Mapk9 Rala Eloc Cul2 Appl1
0.000511442	28	175	KEGG:mmu04360 Axon guidance	Camk2d Sema3d Bmpr1b Cdc42 Cfl2 Dcc Epha5 Epha7 Fzd3 Gnai1 Gnai3 Itgb1 Kras Nck1 Pak3 Pik3r1 Ppp3cb Ppp3r1 Rock2 Sema5a Shh Rasa1 Unc5c Pak2 Pdk1 Pak7 Mapk1 Ntng1
0.000626982	38	274	KEGG:mmu04144 Endocytosis	Dnm3 Wwp1 Capza1 Capza2 Cav2 Cdc42 Eps15 Itch Kif5b Kif5c Smad2 Nedd4 Rab10 Sh3gl2 Stam Arfgef1 Arap2 Eea1 Tgfbr1 Traf6 Tfrc Tsg101 Psd3 Rab5a Vps26a Washc4 Rab11a Rabep1 Vps35 2610002M06Rik Cltc Arpc5 Snx4 Snx5 Dnajc6 Wasl Rab11fip2 Usp8
0.00062988	14	60	KEGG:mmu04730 Long-term depression	Gna13 Gnai1 Gnai3 Gria2 Igf1 Kras Prkcb Plcb1 Plcb4 Ppp2cb Prkg1 Gucy1a2 Mapk1 Gucy1b1
0.00062988	15	67	KEGG:mmu05031 Amphetamine addiction	Maob Atf2 Calm1 Calm2 Camk4 Slc6a3 Gria2 Gria4 Maoa Prkacb Prkcb Ppp1cb Ppp3cb Ppp3r1 Slc18a2
0.00062988	18	91	KEGG:mmu05032 Morphine addiction	Gabra1 Gabra2 Gabra3 Gabra4 Gabrb2 Gabrb3 Gabrg1 Gabrg2 Gnai1 Gnai3 Gng12 Gng2 Gng4 Pde3b Pde4b Prkacb Prkcb Pde4d
0.00065091	24	143	KEGG:mmu04261 Adrenergic signaling in cardiomyocytes	Camk2d Atf2 Atp1b1 Bcl2 Cacna2d1 Cacnb4 Calm1 Calm2 Gnai1 Gnai3 Prkacb Plcb1 Plcb4 Ppp1cb Ppp2cb Slc8a1 Ppp2r3a Akt3 Mapk1 Ppp2r5e Rapgef4 Atp2b1 Ppp2r2a Ppp2r2b
0.000726785	11	40	KEGG:mmu05033 Nicotine addiction	Slc17a6 Gabra1 Gabra2 Gabra3 Gabra4 Gabrb2 Gabrb3 Gabrg1 Gabrg2 Gria2 Gria4
0.000891124	17	86	KEGG:mmu04540 Gap junction	Grm5 Gnai1 Gnai3 Lpar1 Htr2c Kras Prkacb Prkcb Plcb1 Plcb4 Prkg1 Sos1 Sos2 Gucy1a2 Map3k2 Mapk1 Gucy1b1
0.000964149	26	166	KEGG:mmu04530 Tight junction	Prkaa1 Prkaa2 Rap1a Cdc42 Dlg1 Hspa4 Itgb1 Nedd4 Ocln Prkacb Ppp2cb Rapgef6 Rdx Rock2 Rab8b Dlg2 Mapk8 Mapk9 Amot Mpp5 Actr2 Ppp2r2a Rap2c Ppp2r2b Wasl Actr3
0.00102842	18	96	KEGG:mmu04070 Phosphatidylinositol signaling system	Calm1 Calm2 Pik3r1 Pip4k2a Prkcb Plcb1 Plcb4 Pten Mtmr6 Ppip5k2 Inpp4b Impad1 Ocrl Mtmr1 Impa1 Ipmk Tmem55a Mtmr2
0.00102842	20	113	KEGG:mmu04724 Glutamatergic synapse	Grm5 Slc17a6 Gnai1 Gnai3 Gng12 Gng2 Gng4 Gria2 Gria4 Grik2 Prkacb Prkcb Plcb1 Plcb4 Ppp3cb Ppp3r1 Slc1a2 Slc1a3 Mapk1 Homer2
0.00110458	20	114	KEGG:mmu04114 Oocyte meiosis	Camk2d Rps6ka3 Calm1 Calm2 Igf1 Prkacb Ppp1cb Ppp2cb Ppp3cb Ppp3r1 Skp1a Cdc27 Ywhah Ywhaq Cpeb2 Mapk1 Ppp2r5e Cul1 Rps6ka6 Anapc10

## Sheet: GOBIOLOGICAL_Hypo_higher in Vir
GO (Biological Process) analysis for genes repressed by reproductive experience (higher in virgins)--HYPOTHALAMUS
top 30 most significant terms; analysis done with Ensembl_IDs from Supplemental Table 2 lists
Enrichment FDR	Genes in list	Total genes	Functional Category	Genes
1.47795e-27	422	3534	Cellular protein modification process	Dazap2 Galnt1 Kat2b Braf Prkacb Insr Cdc42 Yes1 Ppp1cb Ube2a Map2k3 Sgk1 Igf1 Mapk9 Rps6kb1 Ube2g1 Spag9 Eif2s1 Atxn3 Smad5 Agtpbp1 Mapk8 Fbxl3 Oxr1 Angpt1 Eif2ak2 Impact Smad2 Zdhhc6 Ube3a Lypla1 Sumo1 Rnf2 Itgav Traf6 Spred1 Usp8 Trpm7 Pkia Itch Nceh1 Ufm1 Dclk1 Eif2a Asph Epha7 Prkaa2 Ptpn12 Clock Ate1 Galnt7 Nedd4 Fem1b Ccdc88a Ogt Rsrc1 Tiparp G2e3 Fbxl21 Zdhhc17 March1 Rnf13 Cab39 Atg5 Otud…
1.47795e-27	422	3534	Protein modification process	Dazap2 Galnt1 Kat2b Braf Prkacb Insr Cdc42 Yes1 Ppp1cb Ube2a Map2k3 Sgk1 Igf1 Mapk9 Rps6kb1 Ube2g1 Spag9 Eif2s1 Atxn3 Smad5 Agtpbp1 Mapk8 Fbxl3 Oxr1 Angpt1 Eif2ak2 Impact Smad2 Zdhhc6 Ube3a Lypla1 Sumo1 Rnf2 Itgav Traf6 Spred1 Usp8 Trpm7 Pkia Itch Nceh1 Ufm1 Dclk1 Eif2a Asph Epha7 Prkaa2 Ptpn12 Clock Ate1 Galnt7 Nedd4 Fem1b Ccdc88a Ogt Rsrc1 Tiparp G2e3 Fbxl21 Zdhhc17 March1 Rnf13 Cab39 Atg5 Otud…
1.71813e-26	431	3683	Macromolecule modification	Dazap2 Galnt1 Kat2b Braf Prkacb Insr Cdc42 Yes1 Ppp1cb Ube2a Map2k3 Sgk1 Igf1 Mapk9 Rps6kb1 Ube2g1 Spag9 Eif2s1 Atxn3 Smad5 Agtpbp1 Mapk8 Fbxl3 Oxr1 Angpt1 Eif2ak2 Impact Smad2 Zdhhc6 Ube3a Lypla1 Sumo1 Rnf2 Itgav Traf6 Spred1 Usp8 Trpm7 Pkia Itch Nceh1 Ufm1 Dclk1 Eif2a Asph Epha7 Prkaa2 Ptpn12 Clock Ate1 Galnt7 Nedd4 Fem1b Ccdc88a Ogt Rsrc1 Tiparp G2e3 Fbxl21 Zdhhc17 March1 Rnf13 Cab39 Atg5 Otud…
2.10057e-25	295	2215	Cellular localization	Napb Ift80 Ift74 Vps35 Shh Rala Ywhah Vps26a Pafah1b1 Erbin Angpt1 Twf1 Arl6 Rhoq Syt4 Pkia Kpna4 Dclk1 Ahcyl1 Srsf10 Khdrbs1 Epha5 Uso1 Edem1 Arl8b Zfand6 Arl6ip1 Gpm6b Map4 Rsrc1 Myo5a Syt1 Bag4 Pik3r1 Ipo11 Gpr158 Vsnl1 Nlgn1 Ipo7 Ywhaq Cav2 Mid2 Ddx3x Calm1 Braf Cse1l Stard3nl Sri Ranbp2 Cul3 Rab11a Hnrnpa2b1 Ufd1 Apc Cdc42 Kif5b M6pr Evi5 Tmem87b Tsg101 Efr3a Golga7 Lamp2 Cacnb4 Rhot1 Rab5a …
2.42344e-21	483	4524	Cellular protein metabolic process	Cul1 Skp1a Dazap2 Galnt1 Kat2b Braf Prkacb Insr Cdc42 Dnajb9 Yes1 Ppp1cb Ube2a Map2k3 Sgk1 Igf1 Mapk9 Rps6kb1 Ube2g1 Spag9 Eif2s1 Atxn3 Smad5 Agtpbp1 Mapk8 Fbxl3 Oxr1 Angpt1 Eif3e Eif2ak2 Impact Smad2 Il33 Zdhhc6 Ube3a Xiap Lypla1 Sumo1 Rnf2 Dnajc10 Itgav Traf6 Ubr1 Spred1 Usp8 Trpm7 Pkia Itch Nceh1 Ufm1 Dclk1 Eif2a Asph Ube2j1 Epha7 Prkaa2 Ptpn12 Ube2k Clock Edem1 Ate1 Galnt7 Nedd4 Fem1b Ccdc88a…
1.2274e-18	444	4181	Establishment of localization	Abca5 Rhoq Atp1b1 Napb Ift80 Ift74 Vps35 Shh Slc1a2 Slc1a3 M6pr Rala Yes1 Steap2 Rab5a Ywhah Stxbp5 Slc6a15 Vps26a Tspan13 Cbll1 Pafah1b1 Rab3c Erbin Ppp3cb Slc39a14 Angpt1 Shisa9 Stxbp5l Adcyap1 Syt4 Spire1 Megf10 Il33 Fgf14 Itgb1 Itgav Traf6 Trpm7 Pkia Kpna4 Ahcyl1 Sh3gl2 Srsf10 Khdrbs1 Vamp3 Epha5 Uso1 Edem1 Arl8b Mef2a Zfand6 Arl6ip1 Cask Gpm6b Nedd4 Map4 Rsrc1 Myo5a Arl6ip5 Syt1 Slc39a12 Slc…
1.98757e-18	432	4049	Transport	Abca5 Rhoq Atp1b1 Napb Ift80 Ift74 Vps35 Shh Slc1a2 Slc1a3 M6pr Rala Yes1 Steap2 Rab5a Ywhah Stxbp5 Slc6a15 Vps26a Tspan13 Cbll1 Pafah1b1 Rab3c Erbin Ppp3cb Slc39a14 Angpt1 Shisa9 Stxbp5l Adcyap1 Syt4 Spire1 Megf10 Il33 Fgf14 Itgb1 Itgav Traf6 Trpm7 Pkia Kpna4 Ahcyl1 Sh3gl2 Srsf10 Khdrbs1 Vamp3 Epha5 Uso1 Edem1 Arl8b Mef2a Zfand6 Arl6ip1 Cask Gpm6b Nedd4 Rsrc1 Myo5a Arl6ip5 Syt1 Slc39a12 Slc30a1 …
2.56197e-18	140	859	Protein modification by small protein conjugation or removal	Ube2a Ube2g1 Atxn3 Fbxl3 Ube3a Sumo1 Rnf2 Traf6 Usp8 Itch Ufm1 Nedd4 Fem1b Ogt G2e3 Fbxl21 March1 Rnf13 Otud7b Wwp1 Usp46 Ube4a Ube2n Usp32 Ranbp2 Cul3 Crbn Fbxo11 Tgfbr1 Pten Tsg101 Gid4 Trim37 Cand1 Ube2b Med7 Rnft1 Cbll1 Cdc27 Fbxl20 Hsp90aa1 Hecw1 Atg10 Trim23 Angpt1 Eny2 Ube2v2 Senp5 Fbxl17 Pja2 Cul2 Wac Rnf138 Zfp91 Tnks2 Btbd1 Arih1 Gnl3l Xiap Desi2 March7 Ube2e3 Trim44 Cops2 Ubr1 Trim2 Ub…
1.68278e-17	213	1604	Establishment of localization in cell	Napb Ift80 Ift74 Vps35 Ywhah Vps26a Pafah1b1 Erbin Angpt1 Syt4 Pkia Kpna4 Ahcyl1 Srsf10 Khdrbs1 Epha5 Uso1 Edem1 Arl8b Zfand6 Arl6ip1 Gpm6b Map4 Rsrc1 Myo5a Syt1 Ipo11 Vsnl1 Nlgn1 Ipo7 Ywhaq Calm1 Cse1l Stard3nl Sri Ranbp2 Cul3 Rab11a Hnrnpa2b1 Ufd1 Cdc42 Kif5b M6pr Evi5 Tmem87b Tsg101 Lamp2 Cacnb4 Rhot1 Rab5a Pex3 Igf1 Rab1a Pex13 Erlec1 Hspa4 Snx13 Bcap29 Rab10 Spag9 Scfd1 Sec23a Hif1a Tmed10 H…
1.68278e-17	195	1417	Cellular macromolecule localization	Shh Ywhah Erbin Angpt1 Twf1 Arl6 Rhoq Pkia Kpna4 Dclk1 Ahcyl1 Uso1 Edem1 Zfand6 Arl6ip1 Gpm6b Bag4 Pik3r1 Ipo11 Gpr158 Nlgn1 Ipo7 Ywhaq Mid2 Ddx3x Braf Cse1l Ranbp2 Rab11a Hnrnpa2b1 Ufd1 Apc Cdc42 Kif5b M6pr Efr3a Golga7 Lamp2 Cacnb4 Pex3 Igf1 Pex13 Erlec1 Hspa4 Rtn4 Rock2 Snx13 Bcap29 Rab10 Sec23a Mpp5 Atp6v1d Tmed10 Hsp90aa1 Slf1 Ap3m1 Slmap Kpna3 Pibf1 Golph3 Rad21 Eny2 Dlg1 Fyttd1 Kpna1 Vapa …
1.6925e-17	194	1409	Cellular protein localization	Shh Ywhah Erbin Angpt1 Twf1 Arl6 Rhoq Pkia Kpna4 Dclk1 Ahcyl1 Uso1 Edem1 Zfand6 Arl6ip1 Gpm6b Bag4 Pik3r1 Ipo11 Gpr158 Nlgn1 Ipo7 Ywhaq Mid2 Ddx3x Braf Cse1l Ranbp2 Rab11a Hnrnpa2b1 Ufd1 Apc Cdc42 Kif5b M6pr Efr3a Golga7 Lamp2 Cacnb4 Pex3 Igf1 Pex13 Erlec1 Hspa4 Rtn4 Rock2 Snx13 Bcap29 Rab10 Sec23a Mpp5 Atp6v1d Tmed10 Hsp90aa1 Slf1 Ap3m1 Slmap Kpna3 Pibf1 Golph3 Rad21 Eny2 Dlg1 Fyttd1 Kpna1 Vapa …
2.362e-17	279	2325	Protein localization	Shh M6pr Ywhah Erbin Angpt1 Twf1 Arl6 Stxbp5l Rhoq Adcyap1 Il33 Nckap1 Itgav Traf6 Pkia Kpna4 Dclk1 Nbea Ahcyl1 Epha5 Uso1 Edem1 Zfand6 Arl6ip1 Gpm6b Bag4 Pik3r1 Ipo11 Gpr158 Rapgef4 Vsnl1 Pclo Nlgn1 Ipo7 Ywhaq Mid2 Ddx3x Braf Cse1l Ranbp2 Rab11a Hnrnpa2b1 Ufd1 Apc Cdc42 Kif5b Tsg101 Efr3a Golga7 Lamp2 Cacnb4 Rab5a Stxbp5 Pex3 Lin7a Igf1 Vps26a Rab1a Pex13 Erlec1 Hspa4 Rtn4 Rock2 Snx13 Bcap29 Rab…
9.1851e-17	304	2631	Macromolecule localization	Abca5 Shh M6pr Ywhah Erbin Angpt1 Twf1 Arl6 Stxbp5l Rhoq Adcyap1 Il33 Nckap1 Itgav Traf6 Pkia Kpna4 Dclk1 Nbea Ahcyl1 Khdrbs1 Epha5 Uso1 Edem1 Zfand6 Arl6ip1 Gpm6b Bag4 Pik3r1 Ipo11 Gpr158 Rapgef4 Vsnl1 Pclo Nlgn1 Ipo7 Ywhaq Mid2 Ddx3x Braf Cse1l Ranbp2 Rab11a Hnrnpa2b1 Ufd1 Apc Cdc42 Kif5b Tsg101 Efr3a Golga7 Lamp2 Cacnb4 Pitpna Rab5a Stxbp5 Pex3 Lin7a Igf1 Vps26a Rab1a Osbpl8 Pex13 Erlec1 Hspa4…
6.21711e-16	328	2944	Phosphorus metabolic process	Dlat Dld Dazap2 Kat2b Ocrl Braf Ranbp2 Prkacb Insr Cdc42 Yes1 Ppp1cb Adss Pank3 Map2k3 Sgk1 Igf1 Mapk9 Rps6kb1 Nampt Spag9 Sgpp1 Eif2s1 Smad5 Mapk8 Rrm2b Angpt1 Eif2ak2 Impact Smad2 Itgav Spred1 Trpm7 Pkia Nceh1 Dclk1 Eif2a Epha7 Prkaa2 Ptpn12 Mtmr2 Ccdc88a Rsrc1 Cab39 Bag4 Lpar1 Cept1 Pik3r1 Inpp5f Mapk6 Rap2c Prkcb Prkg1 Camk2d Adam10 Ghr Bcl2 Chpt1 Gdpd1 Mapk1 Dusp22 Ccnyl1 Ttbk2 Gnai3 Cav2 At…
8.30672e-16	170	1217	Intracellular transport	Ift80 Ift74 Vps35 Ywhah Vps26a Pafah1b1 Erbin Angpt1 Pkia Kpna4 Ahcyl1 Srsf10 Khdrbs1 Uso1 Edem1 Arl8b Zfand6 Arl6ip1 Rsrc1 Myo5a Syt1 Ipo11 Ipo7 Ywhaq Cse1l Ranbp2 Cul3 Rab11a Hnrnpa2b1 Ufd1 Cdc42 Kif5b M6pr Evi5 Tmem87b Tsg101 Lamp2 Cacnb4 Rhot1 Rab5a Pex3 Igf1 Rab1a Pex13 Erlec1 Hspa4 Snx13 Bcap29 Rab10 Spag9 Scfd1 Sec23a Hif1a Tmed10 Hsp90aa1 Rhobtb3 Col4a3bp Ap3m1 Kpna3 Eny2 Tbc1d23 Dnm1l Fy…
2.19464e-15	324	2925	Phosphate-containing compound metabolic process	Dlat Dld Dazap2 Kat2b Ocrl Braf Ranbp2 Prkacb Insr Cdc42 Yes1 Ppp1cb Adss Pank3 Map2k3 Sgk1 Igf1 Mapk9 Rps6kb1 Nampt Spag9 Sgpp1 Eif2s1 Smad5 Mapk8 Rrm2b Angpt1 Eif2ak2 Impact Smad2 Itgav Spred1 Trpm7 Pkia Nceh1 Dclk1 Eif2a Epha7 Prkaa2 Ptpn12 Mtmr2 Ccdc88a Rsrc1 Cab39 Bag4 Lpar1 Cept1 Pik3r1 Inpp5f Mapk6 Rap2c Prkcb Prkg1 Camk2d Adam10 Ghr Bcl2 Chpt1 Gdpd1 Mapk1 Dusp22 Ccnyl1 Ttbk2 Gnai3 Cav2 At…
2.19464e-15	120	744	Protein modification by small protein conjugation	Ube2a Ube2g1 Fbxl3 Ube3a Sumo1 Rnf2 Traf6 Itch Ufm1 Nedd4 Fem1b Ogt G2e3 Fbxl21 March1 Rnf13 Wwp1 Ube4a Ube2n Ranbp2 Cul3 Crbn Fbxo11 Tgfbr1 Pten Tsg101 Gid4 Trim37 Cand1 Ube2b Med7 Rnft1 Cbll1 Cdc27 Fbxl20 Hsp90aa1 Hecw1 Atg10 Trim23 Angpt1 Ube2v2 Fbxl17 Pja2 Cul2 Wac Rnf138 Zfp91 Tnks2 Btbd1 Arih1 Gnl3l Xiap March7 Ube2e3 Trim44 Ubr1 Trim2 Ube2j1 Dnaja1 Rnf11 Klhl7 Ube2k Cul1 Uba3 Cul4b Nae1 Ub…
1.29336e-14	113	697	Protein ubiquitination	Ube2a Ube2g1 Fbxl3 Ube3a Rnf2 Traf6 Itch Nedd4 Fem1b Ogt G2e3 Fbxl21 March1 Rnf13 Wwp1 Ube4a Ube2n Cul3 Crbn Fbxo11 Tgfbr1 Pten Tsg101 Gid4 Trim37 Cand1 Ube2b Med7 Rnft1 Cbll1 Cdc27 Fbxl20 Hsp90aa1 Hecw1 Trim23 Angpt1 Ube2v2 Fbxl17 Pja2 Cul2 Wac Rnf138 Zfp91 Tnks2 Btbd1 Arih1 Gnl3l Xiap March7 Ube2e3 Trim44 Ubr1 Trim2 Ube2j1 Dnaja1 Rnf11 Klhl7 Ube2k Cul1 Cul4b Ube2q2 Trim33 Asb13 Trim36 Kctd9 Zyg…
1.29336e-14	183	1389	Cell projection organization	Ift80 Ift74 Braf Shh Cdc42 Ywhah Fgd4 Ermn Nckap1 Epha7 Epha5 Chl1 Ttyh1 Gpm6a Tmem30a Ccdc88a Lpar1 Negr1 Bcl2 Rit2 Abi1 Ntng1 Btbd3 Ptprz1 Rap1a Fmr1 Ocrl Cul3 Pkn2 Rab11a Ulk2 Eif4g2 Apc Arpc5 Rala Pdcl Pten Map2 Rab5a Trove2 Hdac2 Plek Actr2 Rtn4 Pafah1b1 Atl1 Atp6v1d Hsp90aa1 Arf4 Pibf1 Golph3 Ube2v2 Fopnl Arl6 Dnm1l Spast Vapa Rhoq Adcyap1 Syt4 Jak2 Ube3a Actr3 Skil Dhx36 Pfn2 Serpini1 Fam9…
9.41704e-14	479	4904	Positive regulation of cellular process	Cxadr Lmx1a Dazap2 Kat2b Braf Shh Ranbp2 Nfat5 Etv1 Cdc42 Kif5b Tgfbr1 Nfib Yes1 Serinc3 Map2k3 Stxbp5 Igf1 Osbpl8 Nfyb Ppp4r3b Cbll1 Spag9 Hif1a Hsp90aa1 Smad5 Bmpr1a Bnip3l Angpt1 Fam49b Ppara Tfrc Zfp148 Smad2 Il33 Cfh Nucks1 Pou2f1 Nckap1 Spred1 Mal Tpd52 Dhx36 Eif2a Trp53inp1 Epha7 Ift74 Vamp3 Cd38 Ppargc1a Slc30a9 Clock Cnbp Edem1 St8sia1 Mef2a Cnot7 Tmem30a Ccdc88a Gpbp1 Map2k4 Tcea1 Lrrn1…
1.16561e-13	177	1358	Plasma membrane bounded cell projection organization	Ift80 Ift74 Braf Shh Cdc42 Ywhah Fgd4 Nckap1 Epha7 Epha5 Chl1 Ttyh1 Gpm6a Tmem30a Ccdc88a Lpar1 Negr1 Bcl2 Rit2 Abi1 Ntng1 Btbd3 Ptprz1 Rap1a Fmr1 Ocrl Rab11a Ulk2 Eif4g2 Apc Arpc5 Rala Pten Map2 Rab5a Hdac2 Plek Actr2 Rtn4 Pafah1b1 Atl1 Atp6v1d Hsp90aa1 Arf4 Pibf1 Golph3 Ube2v2 Arl6 Dnm1l Spast Vapa Rhoq Adcyap1 Syt4 Jak2 Ube3a Actr3 Skil Dhx36 Pfn2 Serpini1 Fam92a Cd38 Tmem106b Usp9x Cul4b Acsl…
3.33683e-13	357	3429	Regulation of biological quality	Slc1a2 Igf1 Gna13 Sav1 Hsp90aa1 Angpt1 Twf1 Shisa9 Tfrc Stxbp5l Rhoq Adcyap1 Syt4 Ermn Nckap1 Asph Epha7 Epha5 Arl6ip1 Gpm6b Ireb2 Med13 Lrrn1 Arl6ip5 Syt1 Lrrn3 Slc30a1 Lpar1 Rhou Rc3h1 Pik3r1 Fmn1 Shroom2 Flrt2 Rapgef4 Flrt3 Prkcb Aldh1a1 Vsnl1 Grik2 Bcl2 Pclo Nlgn1 Lrrtm2 Hnrnpd Fmr1 Calm1 Sri Clcn3 Cul3 Rab11a Slc1a3 Insr Eif4g2 Slc30a4 Cdc42 Kif5b Gabrb2 Arpc5 Pten Naf1 Golga7 Steap2 Capza2 …
3.42625e-13	334	3155	Organelle organization	Spin1 Ift80 Ift74 Kat2b Map2 Dstn Igf1 Pum2 Tmed10 Twf1 Spast Rtn3 Hdgfl3 Rnf2 Ermn Nckap1 Trpm7 Dhx36 Vamp3 Epha5 Brdt Zfand6 Smarca5 Map4 Map9 Diaph2 Togaram1 Higd1a Lpar1 Rhou Fmn1 Shroom2 Plcb1 Bcl2 Nsd2 Ccser2 Pclo Cfl2 Nlgn1 Nap1l2 Gnai3 Cav2 Ddx3x Fmr1 Ocrl Cul3 Rab11a Insr Apc Sfmbt1 Cdc42 Kif5b Arpc5 Rala Lnpk Tsg101 Naf1 Capza2 Ube2a Pls3 Taok1 Suz12 Rhot1 Crk Vmp1 Trim37 Akt3 Hdac2 Pex…
3.42625e-13	249	2166	Nervous system development	Lmx1a Braf Shh Ywhah Igf1 Rtn4 Il33 Epha7 Epha5 Chl1 Gpm6a Tmem30a Ccdc88a Pds5b Lrrn1 Brinp3 Lrrn3 Lpar1 Negr1 Nrg3 Flrt2 Flrt3 Bcl2 Rit2 Abi1 Ntng1 Btbd3 Nlgn1 Ptprz1 Rap1a Lrrtm2 Gnai3 Hnrnpd Fmr1 Pafah1b2 Etv1 Rab11a Ulk2 Eif4g2 Cdc42 Kif5b Fzd3 Arpc5 Pten Map2 Rarb Hdac2 Atp2b1 Actr2 Pafah1b1 Aspa Snw1 Atl1 Mpp5 Hsp90aa1 Agtpbp1 Kif2a Arf4 Oxct1 Sdc2 Rida Ube2v2 Tbc1d23 Dnm1l Chodl D16Ertd47…
3.42625e-13	387	3797	Regulation of biosynthetic process	Bmpr1a Nucks1 C1d Kat2b Gmcl1 Shh Nfat5 Etv1 Nfib Tsg101 Lcorl Rarb Tmpo Igf1 Nfyb Ppp4r3b Id2 Hif1a Eif2s1 Yy1 Hsp90aa1 Smad5 Nr1d2 Ppara Zfp148 Brwd1 Twsg1 Impact Smad2 Il33 Sumo1 Pou2f1 Lmx1a Sp3 Cops2 Pkia Skil Dhx36 Eif2a Ift74 Khdrbs1 Ppargc1a Slc30a9 Clock Foxp2 Cnbp Mef2a Rbbp7 Cnot7 Smarca5 Gpbp1 Tcea1 Med13 Mitf Otud7b Cbfa2t2 Rbpj Rbms3 Zfp704 Rc3h1 Dhx33 Rfx3 Wwp1 Pik3r1 Csrnp3 Zfp322…
4.07594e-13	262	2318	Regulation of cellular component organization	Stk38l Braf Tsg101 Ywhah Igf1 Gna13 Cbll1 Twf1 Rhoq Impact Hdgfl3 Ermn Nckap1 Asph Epha7 Sh3gl2 Epha5 Tmem30a Ccdc88a Lrrn1 Togaram1 Lrrn3 Higd1a Lpar1 Rhou Negr1 Fmn1 Shroom2 Flrt2 Plcb1 Flrt3 Rit2 Nlgn1 Rap1a Lrrtm2 Nap1l2 Cav2 Kat2b Ddx3x Fmr1 Cul3 Crbn Insr Eif4g2 Apc Cdc42 Kif5b Tgfbr1 Arpc5 Rala Lnpk Pten Mertk Naf1 Capza2 Dstn Taok1 Crk Rab5a Trim37 Hdac2 Cand1 Plek Actr2 Rtn4 Rock2 Cdc27 …
4.5696e-13	160	1203	Vesicle-mediated transport	Napb Vps35 Shh Rala Rab5a Stxbp5 Vps26a Cbll1 Rab3c Ppp3cb Stxbp5l Spire1 Megf10 Itgb1 Itgav Sh3gl2 Vamp3 Syt1 Picalm Inpp5f Rapgef4 Vsnl1 Pclo Gnai3 Cav2 Fmr1 Stard3nl Cul3 Rab11a Kif5b Evi5 Pten Tmem87b Mertk Tsg101 Golga7 Steap2 Cnih1 Cacnb4 Lin7a Plek Rab1a Bcap29 Rab10 Rabep1 Spag9 Scfd1 Sec23a Gdi2 Tmed10 Exoc2 Rhobtb3 Ap3m1 Arf4 Golph3 Angpt1 Tbc1d23 Dnm1l Tfrc Snx4 Synj1 Spast Vapa Prepl …
5.78957e-13	380	3727	Regulation of cellular biosynthetic process	Bmpr1a Nucks1 C1d Kat2b Gmcl1 Shh Nfat5 Etv1 Nfib Tsg101 Lcorl Rarb Tmpo Igf1 Nfyb Ppp4r3b Id2 Hif1a Eif2s1 Yy1 Hsp90aa1 Smad5 Nr1d2 Ppara Zfp148 Brwd1 Twsg1 Impact Smad2 Il33 Sumo1 Pou2f1 Lmx1a Sp3 Cops2 Pkia Skil Dhx36 Eif2a Ift74 Khdrbs1 Ppargc1a Slc30a9 Clock Foxp2 Cnbp Mef2a Rbbp7 Cnot7 Smarca5 Gpbp1 Tcea1 Med13 Mitf Otud7b Cbfa2t2 Rbpj Rbms3 Zfp704 Rc3h1 Dhx33 Rfx3 Wwp1 Pik3r1 Csrnp3 Zfp322…
6.70165e-13	276	2491	Cellular component assembly	Srsf10 Cav2 Celf2 Pkn2 Celf1 Cdc42 Pum2 Spag9 Twf1 Fgd4 Impact Rtn3 Hdgfl3 Nckap1 Ptbp2 Epha7 Vamp3 Ttyh1 Map9 Diaph2 Lrrn1 Togaram1 Lrrn3 Lpar1 Fmn1 Flrt2 Ric3 Flrt3 Nlgn1 Lrrtm2 Kat2b Ddx3x Fmr1 Ocrl Braf Cul3 Rab11a Slc1a2 Crbn Insr Apc Arpc5 Rala Pten Tsg101 Naf1 Capza2 Pls3 Crk Rab5a Vmp1 Trim37 Lims1 Cand1 Plek Rab1a Actr2 Hspa4 Rtn4 Rock2 Scfd1 Sec23a Atl1 Mpp5 Atp6v1d Tmed10 Hsp90aa1 Eif5…
1.21683e-12	194	1580	Protein transport	M6pr Ywhah Erbin Angpt1 Stxbp5l Adcyap1 Il33 Itgav Traf6 Pkia Kpna4 Ahcyl1 Epha5 Uso1 Edem1 Zfand6 Arl6ip1 Ipo11 Rapgef4 Vsnl1 Pclo Ipo7 Ywhaq Cse1l Ranbp2 Rab11a Hnrnpa2b1 Ufd1 Cdc42 Kif5b Tsg101 Golga7 Lamp2 Rab5a Stxbp5 Pex3 Lin7a Igf1 Vps26a Rab1a Pex13 Erlec1 Hspa4 Snx13 Bcap29 Rab10 Rabep1 Scfd1 Sec23a Gdi2 Tmed10 Hsp90aa1 Exoc2 Scamp1 Rab3c Ap3m1 Ktn1 Arf4 Kpna3 Oxct1 Golph3 Eny2 Arl6 Dnm1…

## Sheet: KEGG_Hypo_higher in primiparous
KEGG pathway analysis for genes INDUCED by reproductive experience (higher in primiparous)--HYPOTHALAMUS
top 30 most significant terms; analysis done with Ensembl_IDs from Supplemental Table 2 lists
Enrichment FDR	Genes in list	Total genes	Functional Category	Genes
8.56595e-13	32	129	Ribosome	Rpl37 Rpl27 Rplp0 Fau Rpl10a Rpl18 Rpl26 Rpl28 Rps12 Rps15 Rps16 Rps17 Rps18 Rps19 Rps29 Rps7 Rpl27a Rpl12 Rpl8 Rpl13 Rps28 Rpl36 Rplp1 Mrpl12 Rpl34 Mrps21 Mrps15 Rps10 Rplp2 Rpl41 Rps13 Mrps18a
0.013111	17	130	Spliceosome	Snrpd2 Srsf9 Hspa1a Sf3a2 Sart1 Snrnp70 Pcbp1 Lsm2 Cherp Lsm4 Ddx39b Prpf40b Acin1 Srsf4 Dhx16 Ddx23 Hnrnpm
0.0166755	11	66	Glycolysis / Gluconeogenesis	Gck Aldh2 Aldoa Eno1 Gpi1 Hk1 Pfkl Pkm Tpi1 Akr1a1 G6pc3
0.0216739	18	162	Protein processing in endoplasmic reticulum	Rpn1 Bax Hyou1 Dad1 Ddit3 Hsp90ab1 Prkcsh Rad23a Hspa1a Nsfl1c Preb Mbtps1 Dnajb2 Erp29 Pdia6 Syvn1 Ern1 Rrbp1
0.0216739	25	260	Endocytosis	Arap3 Arf5 Acap3 H2-Q2 Pip5k1c Cyth2 Hspa1a Sh3gl1 Src Chmp6 Agap3 Rab11fip3 Agap2 Arrb2 Sh3glb2 Arfgap1 Asap3 Iqsec2 Bin1 Vps28 Rnf41 Mvb12a Psd Cltb Arfgap2
0.0216739	23	227	Thermogenesis	Adcy3 Ndufb11 Adcy6 Atp5g1 Atp5k Cox17 Cox4i1 Cox5b Prkaca Rps6ka2 Smarca4 Smarcb1 Uqcrq Atp5l Ndufs6 Sdhc Uqcr10 Akt1s1 Smarcc2 Ndufb10 Cpt1c Ndufv3 Actl6b
0.0241889	8	43	Carbohydrate digestion and absorption	Akt1 Atp1a1 Hk1 Pik3cd Pik3r2 Atp1a3 Slc2a5 G6pc3
0.03352	15	131	Oxidative phosphorylation	Ndufb11 Atp5g1 Atp5k Cox17 Cox4i1 Cox5b Uqcrq Tcirg1 Atp5l Ndufs6 Sdhc Atp6v1f Uqcr10 Ndufb10 Ndufv3
0.034487	16	148	Non-alcoholic fatty liver disease (NAFLD)	Ndufb11 Akt1 Bax Cox4i1 Cox5b Ddit3 Pik3cd Pik3r2 Uqcrq Map3k11 Ndufs6 Sdhc Uqcr10 Ndufb10 Ndufv3 Ern1
0.034487	19	189	Huntington disease	Ndufb11 Dnah1 Atp5g1 Bax Cox4i1 Cox5b Dctn1 Dlg4 Grin1 Hap1 Uqcrq Dnah2 Ndufs6 Sdhc Uqcr10 Polr2l Ndufb10 Cltb Ndufv3
0.0399774	18	180	Axon guidance	Unc5b Camk2b Efnb1 Efnb3 Plxnb2 Gnai2 Rac3 Pik3cd Pik3r2 Plxna1 Plxna3 Sema4a Sema4f Sema6b Slit1 Src Ssh3 Myl12b

## Sheet: GOBi_Hypo_higher in primiparous
GO (Biological Process) analysis for genes induced by reproductive experience (higher in primiparous)--HYPOTHALAMUS
top 30 most significant terms; analysis done with Ensembl_IDs from Supplemental Table 2 lists
Enrichment FDR	Genes in list	Total genes	Functional Category	Genes
1.90075e-12	183	2166	Nervous system development	Jakmip1 Akt1 Efnb3 Nes Rac3 Fkbp8 Tcf3 Dlg4 Slit1 Notch1 Adgrb2 Dvl1 Smarca4 Cspg4 Nrxn2 Adgrb1 Pip5k1c Palm Psd Olig2 Trim46 Lrrc4b Nlgn2 Taok2 Kndc1 Syngap1 Gprin1 Sema4f Smarcb1 Sema6b Ckb Apoe Coq8b Chd5 Sh2b2 Tbcb Cnp Nf2 Ttbk1 Map1s H2afy2 Sf3a2 Dbnl Unk Nme2 Cpne6 Rogdi Sharpin Scrib Cpne5 Mapk8ip3 Bin1 Afg3l2 Mark2 Smarcc2 Baiap2 Itm2c Wdr5 Chac1 Cst3 Sema4a Crmp1 P2rx4 Rita1 Dtx1 Actl6b …
5.7904e-10	183	2318	Regulation of cellular component organization	Akt1 Efnb3 Cdc37 Fzr1 Evl Dmtn Rps6ka2 Bin1 Spef1 Arfgap1 Src Sema4a P3h1 Adgrb2 Hdac6 Fhod3 Adgrb1 Palm Lrrc4b Taok2 Kndc1 Syngap1 Axin2 Sema4f Myo18a Smg5 Supt6 Hdgfl2 Apoe Sh3gl1 Paf1 Ddr1 Ruvbl2 Bax Dnmt1 Prkaca Ankrd13d Pfdn2 Rbm14 Nf2 Fsd1 Sptbn4 Ehmt2 Ttbk1 Myo1c Rac3 Sart3 Map1s Calm3 Ddx39b Sf3a2 Ncln 1810043G02Rik Nme2 Myh10 Cpne6 Myh9 Ercc4 Hsf1 Fmnl3 Brd4 Cpne5 Ift140 Rab1b Gal Arl2 M…
7.96319e-09	226	3155	Organelle organization	Ift140 Actl6b Akt1 Bax Kdm6b Map1s Cdc37 Fzr1 Dlg4 Evl Nisch Myh9 Rps6ka2 Bin1 Ptma Spef1 Src Dvl1 Fscn1 Hdac6 Smarca4 Hsf4 Nrxn2 Vps18 Fhod3 Dbn1 Mbd3 Palm Shank2 Nlgn2 Actn4 Taok2 Bscl2 Msrb1 Axin2 Myo18a Smarcb1 Smg5 Supt6 Rec8 Pex6 Flii Tomm40 Paf1 Ruvbl2 Dnmt1 Sgta Chd5 Letm1 Kptn Pfdn2 Rbm14 Cnp Stx1a Ncaph2 Vps72 Nf2 Dmap1 Fsd1 Sptbn4 Ehmt2 Tppp3 Sqstm1 Elmo2 Myo1c Rac3 Tomm34 Sart3 Dnah1 …
1.50552e-08	177	2325	Protein localization	Akt1 Nedd8 Myo1c Pfkl Dlg4 Csnk1e Aspscr1 Ddit3 Pik3r2 Mbtps1 Nrxn2 Palm Hk1 Gas8 Poldip3 Agrn Nlgn2 Ddrgk1 Rbm15b Axin2 Myo18a Jup Use1 Pex6 Atg4d Tomm40 Apoe Grik5 Paf1 Ruvbl2 Sgta Kptn Hap1 Stx1a Dmap1 Sqstm1 Tomm34 Cog1 Calm3 Ddx39b Ap4m1 H2afy2 Rab36 Ap3d1 Arf5 Srp68 Exoc7 Myh10 Pacs2 Klc1 Rangap1 Samm50 Myh9 Scrib Bsg Hsp90ab1 Mapk8ip3 Ift140 Cuta Tm7sf2 Syvn1 Pitpnm1 Rab1b Arl2 Chmp6 Baiap…
1.50552e-08	298	4524	Cellular protein metabolic process	Park7 Arrb2 Mapk7 Akt1 Ddr1 Bax Psap Plod3 Prkaca Usp19 Nf2 Sptbn4 Ptprs Tmem259 Eef1a2 Slc35c2 Kdm6b P4ha2 Cdc37 Tcf3 Ern1 Mink1 Nr1d1 Csnk1e Hsf1 Mapk8ip2 Rps6ka2 Brd4 Mapk8ip3 Afg3l2 Rnf41 Rnf25 Src St3gal3 Lypla2 Mib2 Dvl1 Ppm1g Ncor2 Pxn Hdac6 Porcn Clk3 Hsf4 Mif Rnf126 Trmt112 Zdhhc1 Prkd2 Agrn Fzd5 Sirt5 Eif3b Camk2b Kndc1 Eif3g Msrb1 Ctdsp2 Axin2 Rpl13 Gtf2h4 Pnck Supt6 Mdp1 Clpp Adprh Ap…
1.67451e-08	170	2215	Cellular localization	Ift140 Letm1 Myo1c Csnk1e Myh9 Map4k2 Slit1 Aspscr1 Ddit3 Flna Pik3r2 Mbtps1 Nrxn2 Palm Gas8 Poldip3 Agrn Nlgn2 Rgs14 Ddrgk1 Rbm15b Axin2 Jup Akt1 Pex6 Grin2d Tomm40 Apoe Sh3gl1 Grik5 Paf1 Ruvbl2 Sgta Kptn Stx1a Dmap1 Tomm34 Calm3 Ddx39b Ap4m1 Zwint H2afy2 Ap3d1 Srp68 Ube2o Pacs2 Chga Klc1 Jph4 Rangap1 Samm50 Scrib Bsg Hsp90ab1 Mapk8ip3 Bin1 Syvn1 Rab1b Arl2 Chmp6 Gaa Get4 Stx6 Grin1 Pex16 Nsfl1c…
5.50035e-08	236	3429	Regulation of biological quality	Flna Apoe Letm1 Usp19 Tcf3 Pfkl Ace Evl Dmtn Rps6ka2 Bin1 Aspscr1 Grin1 Raly Sema4a Adgrb2 Npy Rbm10 Proz Pik3r2 Mif Fhod3 Cacna1a Adgrb1 Gna11 Palm Apex1 Cib2 Whrn Pcsk1n Atp1a3 Agrn Lrrc4b Rgs14 Insyn1 Bscl2 H2-Ke6 Axin2 Itgb2 Sema4f Ckb Smg5 Jup Akt1 Pex6 Grin2d Sh3gl1 Grik5 Ddr1 Rad23a Bax Prkaca Por Cnp Ddah2 Stx1a Khsrp Akt1s1 Sptbn4 Slc9a5 Sqstm1 Myo1c Calm3 Ap3d1 Ncln 1810043G02Rik Pdia6 …
6.98645e-08	119	1409	Cellular protein localization	Myo1c Csnk1e Aspscr1 Ddit3 Pik3r2 Mbtps1 Nrxn2 Palm Gas8 Poldip3 Agrn Nlgn2 Ddrgk1 Rbm15b Axin2 Jup Akt1 Pex6 Tomm40 Apoe Grik5 Paf1 Ruvbl2 Sgta Kptn Stx1a Dmap1 Tomm34 Calm3 Ddx39b Ap4m1 H2afy2 Ap3d1 Srp68 Pacs2 Klc1 Rangap1 Samm50 Scrib Bsg Hsp90ab1 Mapk8ip3 Ift140 Syvn1 Arl2 Get4 Stx6 Pex16 Nsfl1c Tln1 Park7 Pex14 Dvl1 Tesc Lrwd1 Ptn Nucb1 Gripap1 Hdac6 Flna Necab2 Mau2 Flcn Vps18 Hk1 Mcrs1 Ce…
7.27825e-08	287	4400	System development	Notch1 Jakmip1 Col18a1 Akt1 Efnb3 Nes Rac3 Fkbp8 Tcf3 Dlg4 Rogdi Rps6ka2 Slit1 Rnf41 Wdr5 Adgrb2 Dvl1 Dtx1 Ptn Plxna1 Smarca4 Cspg4 Nrxn2 Adgrb1 Pip5k1c Palm Psd Olig2 Sh2b3 Trim46 Basp1 Lrrc4b Nlgn2 Taok2 Arrb2 Kndc1 Syngap1 Gprin1 Axin2 Itgb2 Sema4f Smarcb1 Sema6b Ckb Jup Borcs8 Jag2 Apoe Paf1 Ddr1 Coq8b Dnmt1 Chd5 Sh2b2 Por Tbcb Cnp Emc10 Nf2 Ttbk1 Qdpr Map1s Ddx39b H2afy2 Unc5b Sf3a2 Dbnl Ace…
7.93433e-08	119	1417	Cellular macromolecule localization	Myo1c Csnk1e Aspscr1 Ddit3 Pik3r2 Mbtps1 Nrxn2 Palm Gas8 Poldip3 Agrn Nlgn2 Ddrgk1 Rbm15b Axin2 Jup Akt1 Pex6 Tomm40 Apoe Grik5 Paf1 Ruvbl2 Sgta Kptn Stx1a Dmap1 Tomm34 Calm3 Ddx39b Ap4m1 H2afy2 Ap3d1 Srp68 Pacs2 Klc1 Rangap1 Samm50 Scrib Bsg Hsp90ab1 Mapk8ip3 Ift140 Syvn1 Arl2 Get4 Stx6 Pex16 Nsfl1c Tln1 Park7 Pex14 Dvl1 Tesc Lrwd1 Ptn Nucb1 Gripap1 Hdac6 Flna Necab2 Mau2 Flcn Vps18 Hk1 Mcrs1 Ce…
3.32909e-07	310	4912	Multicellular organism development	Notch1 Jakmip1 Axin2 Col18a1 Akt1 Efnb3 Nes Rac3 Fkbp8 Tcf3 Dlg4 Rogdi Rps6ka2 Slit1 Rnf41 Ddit3 Wdr5 Adgrb2 Dvl1 Pxn Dtx1 Ptn Plxna1 Smarca4 Pkd1 Cspg4 Nrxn2 Adgrb1 Pip5k1c Palm Psd Olig2 Sh2b3 Trim46 Basp1 Lrrc4b Nlgn2 Taok2 Arrb2 Kndc1 Syngap1 Gprin1 Itgb2 Arvcf Sema4f Smarcb1 Mapk7 Sema6b Ckb Jup Borcs8 Jag2 Flii Apoe Paf1 Ddr1 Coq8b Dnmt1 Chd5 Sh2b2 Por Tbcb Cnp Emc10 Nf2 Edf1 Ttbk1 Qdpr Tra…
4.24373e-07	187	2631	Macromolecule localization	Akt1 Apoe Nedd8 Myo1c Pfkl Dlg4 Csnk1e Aspscr1 Ddit3 Pik3r2 Mbtps1 Mif Nrxn2 Palm Hk1 Gas8 Poldip3 Agrn Nlgn2 Ddrgk1 Bscl2 Rbm15b Axin2 Myo18a Jup Supt6 Use1 Pex6 Atg4d Tomm40 Grik5 Paf1 Ruvbl2 Psap Sgta Kptn Hap1 Stx1a Khsrp Dmap1 Sqstm1 Pltp Tomm34 Cog1 Calm3 Ddx39b Ap4m1 H2afy2 Rab36 Ap3d1 Arf5 Ace Srp68 Exoc7 Myh10 Pacs2 Klc1 Rangap1 Samm50 Myh9 Hsf1 Scrib Bsg Hsp90ab1 Mapk8ip3 Ift140 Cuta Tm…
5.25703e-07	72	732	RNA processing	Ern1 Sfswap Zc3h3 Rtcb Supt6 Supt5 Paf1 Nob1 Prkaca Lsm2 Dus3l Khsrp Hnrnpl Sart3 Ddx39b Sf3a2 Tsen54 Ddx41 Acin1 Hsf1 Bop1 Prpf40b Sympk Dhx16 Rbfox3 Raly Ints3 Srsf4 Fastk Srsf9 Ints1 Ddx54 Rnf40 Rbm10 Ftsj1 Lsm4 Clk3 Fam207a Ccar2 Usp36 Cpsf1 Tsen34 Srrt Rps16 Mrm3 Scaf1 Trmt112 Sart1 Spout1 Snrpd2 Rps19 Safb2 Fbll1 Cherp Hnrnpm Rpl26 Clasrp Rrp1 Rps7 Rps17 Rpl27 Snrnp70 Rps28 Safb Tut1 Rbm15b…
6.86656e-07	86	949	Neuron projection development	Akt1 Efnb3 Rac3 Dlg4 Slit1 Notch1 Dvl1 Pip5k1c Psd Trim46 Taok2 Kndc1 Syngap1 Gprin1 Sema4f Apoe Map1s Sf3a2 Dbnl Nme2 Cpne6 Cpne5 Mapk8ip3 Afg3l2 Mark2 Baiap2 Itm2c Wdr5 Crmp1 Npy Ptn Unc13a Plxnb2 Cul7 Golga4 Zmynd8 Rapgef1 Prag1 Fbxo31 Map6 Grcc10 Scrib Vangl2 Plxna1 Flna Plxna3 Bex1 Prkcsh Ddr1 Cnp Sptbn4 Ptprs Unc5b Myh10 Dlg5 Mapk8ip2 Celsr3 Hsp90ab1 Unc5a Grin1 Sema4a Acap3 Hdac6 Efnb1 Mks…
8.13747e-07	309	4946	Negative regulation of biological process	Park7 Mapk7 Akt1 Nr2f6 Bax Efnb3 Dnmt1 Psap Atn1 Letm1 Prkaca Usp19 Khsrp Nf2 Dmap1 Slc35c2 Tcf3 Pfkl Trim11 Ern1 Nr1d1 Nisch Rps6ka2 Foxp4 Drap1 Trim8 Ddit3 Ak1 Notch1 Spef1 P3h1 Ppm1g Ncor2 Dtx1 Crtc3 Rbm10 Hdac6 Sin3b Smarca4 Pkd1 Mif Tldc1 Fhod3 Mbd3 Cc2d1a Cdkn1c Olig2 Map3k10 Nkx6-2 Agrn Mypop Rgs14 Dand5 Actn4 Camk2b Thra Rpl26 Zfp13 Suds3 Hes6 Syngap1 Ctdsp2 Axin2 Sema4f Myo18a Smg5 Snd1 …
9.97741e-07	111	1358	Plasma membrane bounded cell projection organization	Ift140 Akt1 Efnb3 Rac3 Dlg4 Slit1 Notch1 Dvl1 Pxn Pip5k1c Psd Trim46 Taok2 Kndc1 Syngap1 Gprin1 Sema4f Apoe Dnah1 Map1s Sf3a2 Dbnl Fbf1 Nme2 Evl Dmtn Cpne6 Cpne5 Mapk8ip3 Afg3l2 Mark2 Baiap2 Itm2c Wdr5 Src Crmp1 Fscn1 Npy Ptn Flna Mks1 Unc13a Palm Plxnb2 Cep250 Cul7 Golga4 Ccdc151 Zmynd8 Wdr34 Cep131 Rapgef1 Ccdc40 Gas8 Crocc Cdc42ep1 Prag1 Fbxo31 Map6 Sept9 Grcc10 Scrib Celsr3 Vangl2 Plxna1 Plxn…
1.03582e-06	187	2673	Cellular component biogenesis	Bax Letm1 Chga Evl Dmtn Bin1 Src Adgrb2 Sfswap Pxn Fscn1 Fkbp4 Hsf4 Nrxn2 Fhod3 Adgrb1 C1ql2 Lrrc4b Nlgn2 Actn4 Bscl2 Msrb1 Smarcb1 Jup Clpp Apoe Prkcsh Paf1 Farsa Nob1 Prkaca Rbm14 Stx1a Nf2 Fsd1 Sptbn4 Tppp3 Ttbk1 Sqstm1 Myo1c Rac3 Sart3 Dnah1 Ddx39b H2afy2 Tysnd1 Ncln Pfkl Dbnl Llgl1 Fbf1 Nme2 Ubtf Pacs2 Samm50 Sharpin Hsf1 Bop1 Plec Hsp90ab1 Ift140 Uqcc2 Tapbp Pfdn6 Atg2a Rab1b Efemp2 Arl2 Dd…
1.59533e-06	112	1389	Cell projection organization	Ift140 Akt1 Efnb3 Rac3 Dlg4 Slit1 Notch1 Dvl1 Pxn Pip5k1c Psd Trim46 Taok2 Kndc1 Syngap1 Gprin1 Sema4f Tchp Apoe Hap1 Dnah1 Map1s Sf3a2 1810043G02Rik Dbnl Fbf1 Nme2 Evl Dmtn Cpne6 Cpne5 Mapk8ip3 Afg3l2 Mark2 Baiap2 Itm2c Cfap126 Wdr5 Src Crmp1 Fscn1 Npy Ptn Flna Mks1 Unc13a Palm Plxnb2 Cep250 Cul7 Golga4 Ccdc151 Zmynd8 Wdr34 Cep131 Rapgef1 Ccdc40 Gas8 Crocc Cdc42ep1 Prag1 Fbxo31 Map6 Sept9 Grcc10…
1.65532e-06	82	911	Cell morphogenesis	Col18a1 Efnb3 Dlg4 Dmtn Slit1 Notch1 Src Sema4a Dvl1 Pip5k1c Palm Trim46 Taok2 Kndc1 Syngap1 Sema4f Rac3 Map1s 1810043G02Rik Dbnl Unk Myh10 Cpne6 Myh9 Fmnl3 Cpne5 Afg3l2 Mark2 Baiap2 Crmp1 Ptn Flna Unc13a Cul7 Golga4 Cdc42ep1 Prag1 Fbxo31 Actn4 Map6 Fmnl1 Nbeal2 Grcc10 Scrib Plxna1 Plxna3 Plxnb2 Spint2 Ddr1 Plod3 Nes Cnp Sptbn4 Ptprs Sart3 Unc5b Mapk8ip2 Celsr3 Hsp90ab1 Mapk8ip3 Unc5a Vangl2 Grin…
1.82789e-06	142	1904	Catabolic process	Galk1 Tpi1 Aldoa Gpi1 Akt1 Usp19 Abhd16a Khsrp Tmem259 Cdc37 Pfkl Ace Nt5c Nr1d1 Lypla2 Akr1a1 Acot7 Nudt9 Rbm10 Pkm Pja1 Sgsm3 Eno1 Axin2 Smg5 Snd1 Clpp Atg4d Apoe Keap1 Pld3 Supt5 Rad23a Bax Pnpla6 Sgta Prkaca Por Psmb4 Cnp Hap1 Ddah2 Cpt1c Qdpr Sqstm1 Psmb6 Tysnd1 Fzr1 Pacs2 Cyp46a1 Hsf1 Sdf2l1 Pcbp4 Hsp90ab1 Uqcc2 Nudt3 Atg2a Syvn1 Rab1b Rnaseh2c Kat5 Trim8 Chmp6 Rnf41 Ddit3 Gaa Get4 Usp20 Ch…
1.82789e-06	92	1071	Neuron development	Akt1 Efnb3 Rac3 Dlg4 Slit1 Notch1 Dvl1 Pip5k1c Psd Trim46 Taok2 Kndc1 Syngap1 Gprin1 Sema4f Apoe Map1s Sf3a2 Dbnl Unk Nme2 Cpne6 Cpne5 Mapk8ip3 Afg3l2 Mark2 Baiap2 Itm2c Wdr5 Crmp1 Npy Ptn Unc13a Plxnb2 Cul7 Golga4 Zmynd8 Rapgef1 Prag1 Fbxo31 Map6 Grcc10 Uqcrq Scrib Vangl2 Plxna1 Flna Plxna3 Bex1 Nr2f6 Prkcsh Ddr1 Cnp Sptbn4 Ptprs Unc5b Myh10 Dlg5 Mapk8ip2 Celsr3 Hsp90ab1 Ift140 Unc5a Grin1 Sema4…
2.60405e-06	122	1574	Neurogenesis	Akt1 Efnb3 Rac3 Tcf3 Dlg4 Slit1 Notch1 Dvl1 Smarca4 Cspg4 Pip5k1c Psd Olig2 Trim46 Taok2 Kndc1 Syngap1 Gprin1 Sema4f Apoe Nf2 Ttbk1 Map1s Sf3a2 Dbnl Unk Nme2 Cpne6 Rogdi Scrib Cpne5 Mapk8ip3 Bin1 Afg3l2 Mark2 Baiap2 Itm2c Wdr5 Crmp1 P2rx4 Dtx1 Npy Ptn Flna Unc13a Plxnb2 Cul7 Golga4 Zmynd8 Rapgef1 Rap1gap Olig1 Prag1 Rgs14 Fbxo31 Map6 Camk2b Cend1 Grcc10 Dbn1 Uqcrq Nab2 Vangl2 Lhx5 Plxna1 Plxna3 N…
2.67291e-06	303	4904	Positive regulation of cellular process	Notch1 Thra Arrb2 Col18a1 Gtf2f1 Jag2 Bax Efnb3 Psap Prkaca Sra1 Tmem259 Eef1a2 Slc35c2 Myo1c Kdm6b Cdc37 Tcf3 Ern1 Mink1 Evl Ddx41 Dmtn Rogdi Mapk8ip3 Bin1 Ddit3 Usf1 Grin1 Src Adgrb2 Park7 Dvl1 Ncor2 Pxn Crtc3 Rbm10 Efnb1 Adgra2 Pik3r2 Smarca4 Mif Adgrb1 Hk1 Nfe2l1 Prkd2 Agrn Sgsm1 Zbtb7c Fzd5 Lrrc4b Zfp219 Selenon Pcbp1 Rgs14 Bsx Actn4 Camk2b Rpl26 Kndc1 Axin2 Itgb2 Myo18a Mapk7 Glmp Akt1 Supt…
5.54123e-06	86	1006	Cellular component morphogenesis	Col18a1 Efnb3 Dlg4 Dmtn Slit1 Notch1 Src Sema4a Dvl1 Pip5k1c Palm Trim46 Taok2 Kndc1 Syngap1 Sema4f Rac3 Map1s 1810043G02Rik Dbnl Unk Myh10 Cpne6 Myh9 Fmnl3 Cpne5 Afg3l2 Mark2 Baiap2 Crmp1 Ptn Flna Fhod3 Unc13a Cul7 Golga4 Phldb1 Cdc42ep1 Prag1 Fbxo31 Actn4 Map6 Fmnl1 Nbeal2 Grcc10 Bax Scrib Plxna1 Plxna3 Plxnb2 Spint2 Ddr1 Plod3 Nes Cnp Sptbn4 Ptprs Sart3 Unc5b Ndufs6 Mapk8ip2 Celsr3 Hsp90ab1 Ma…
5.54123e-06	92	1102	Regulation of organelle organization	Akt1 Cdc37 Fzr1 Evl Rps6ka2 Bin1 Spef1 Src Hdac6 Fhod3 Taok2 Axin2 Smg5 Supt6 Paf1 Ruvbl2 Bax Dnmt1 Pfdn2 Rbm14 Nf2 Fsd1 Sptbn4 Ehmt2 Myo1c Sart3 Map1s Dmtn Ercc4 Brd4 Ift140 Rab1b Arl2 Mark2 Baiap2 Nsfl1c Pxn Fscn1 Usp30 Fkbp4 Rnf40 Flna Vat1 Atp13a2 Asap3 Inf2 Pde4dip Cep250 Cul7 Ppp1r10 Zmynd8 Cep131 Cul9 Crocc Prkd2 Pla2g6 Synpo Phldb1 Upf1 Tmed9 Sept9 Arrb2 Zfp13 Numa1 Noc2l Rnf41 Cdkn1c Gri…
5.54123e-06	114	1463	Generation of neurons	Akt1 Efnb3 Rac3 Tcf3 Dlg4 Slit1 Notch1 Dvl1 Pip5k1c Psd Olig2 Trim46 Taok2 Kndc1 Syngap1 Gprin1 Sema4f Apoe Ttbk1 Map1s Sf3a2 Dbnl Unk Nme2 Cpne6 Cpne5 Mapk8ip3 Bin1 Afg3l2 Mark2 Baiap2 Itm2c Wdr5 Crmp1 P2rx4 Dtx1 Npy Ptn Flna Unc13a Plxnb2 Cul7 Golga4 Zmynd8 Rapgef1 Rap1gap Olig1 Prag1 Rgs14 Fbxo31 Map6 Camk2b Cend1 Grcc10 Dbn1 Uqcrq Scrib Vangl2 Lhx5 Plxna1 Plxna3 Nkx6-2 Bex1 Nr2f6 Jag2 Prkcsh …
5.87724e-06	105	1317	Neuron differentiation	Akt1 Efnb3 Rac3 Tcf3 Dlg4 Slit1 Notch1 Dvl1 Pip5k1c Psd Olig2 Trim46 Taok2 Kndc1 Syngap1 Gprin1 Sema4f Apoe Map1s Sf3a2 Dbnl Unk Nme2 Cpne6 Cpne5 Mapk8ip3 Bin1 Afg3l2 Mark2 Baiap2 Itm2c Wdr5 Crmp1 Dtx1 Npy Ptn Unc13a Plxnb2 Cul7 Golga4 Zmynd8 Rapgef1 Rap1gap Olig1 Prag1 Fbxo31 Map6 Cend1 Grcc10 Uqcrq Scrib Vangl2 Lhx5 Plxna1 Flna Plxna3 Nkx6-2 Bex1 Nr2f6 Jag2 Prkcsh Ddr1 Chd5 Cnp Sptbn4 Ptprs Ehm…
6.70865e-06	55	540	Synaptic signaling	Agrn Rgs14 Insyn1 Apoe Sh3gl1 Grik5 Stx1a Calm3 Nisch Baiap2 Dvl1 P2rx4 Ptn Apba2 Gnai2 Vps18 Unc13a Ppp1r9b Zmynd8 Iqsec2 Pla2g6 Baiap3 Nlgn2 Nptx2 Otof Rac3 Dlg4 Jph4 Grin1 Nrxn2 Sncb Syngap1 Prkaca Sqstm1 Scrib Mapk8ip2 Park7 Slc8a2 Cspg5 Cacna1a Dbn1 Adgrb1 Shank2 Synpo Prrt2 Hrh1 Camk2b Flot1 Arrb2 Bscl2 Grin2d Hap1 Mink1 Src Prr7
6.80062e-06	54	527	Anterograde trans-synaptic signaling	Agrn Rgs14 Insyn1 Apoe Sh3gl1 Grik5 Stx1a Calm3 Nisch Baiap2 Dvl1 P2rx4 Ptn Apba2 Gnai2 Vps18 Unc13a Ppp1r9b Zmynd8 Iqsec2 Pla2g6 Baiap3 Nlgn2 Nptx2 Otof Rac3 Dlg4 Jph4 Grin1 Nrxn2 Sncb Syngap1 Prkaca Sqstm1 Scrib Mapk8ip2 Park7 Slc8a2 Cspg5 Cacna1a Dbn1 Adgrb1 Shank2 Synpo Prrt2 Hrh1 Camk2b Flot1 Arrb2 Bscl2 Grin2d Hap1 Mink1 Src
6.80062e-06	54	527	Chemical synaptic transmission	Agrn Rgs14 Insyn1 Apoe Sh3gl1 Grik5 Stx1a Calm3 Nisch Baiap2 Dvl1 P2rx4 Ptn Apba2 Gnai2 Vps18 Unc13a Ppp1r9b Zmynd8 Iqsec2 Pla2g6 Baiap3 Nlgn2 Nptx2 Otof Rac3 Dlg4 Jph4 Grin1 Nrxn2 Sncb Syngap1 Prkaca Sqstm1 Scrib Mapk8ip2 Park7 Slc8a2 Cspg5 Cacna1a Dbn1 Adgrb1 Shank2 Synpo Prrt2 Hrh1 Camk2b Flot1 Arrb2 Bscl2 Grin2d Hap1 Mink1 Src

## Sheet: KEGG_hypo_Rayetal
KEGG pathway analysis for genes that changed expression in any pairwise comparison in Ray et al (Supplemental Table24 in Ray et al)--HYPOTHALAMUS
top 30 most significant terms; analysis done with Ensembl_IDs from Supplemental Table 2 lists
Enrichment FDR	Genes in list	Total genes	Functional Category	Genes
3.11692e-26	399	3534	Cellular protein modification process	Dazap2 Galnt1 Kat2b Braf Prkacb Insr Cdc42 Yes1 Ppp1cb Ube2a Map2k3 Sgk1 Igf1 Mapk9 Ube2g1 Spag9 Eif2s1 Atxn3 Smad5 Agtpbp1 Mapk8 Oxr1 Angpt1 Eif2ak2 Impact Smad2 Zdhhc6 Ube3a Lypla1 Sumo1 Rnf2 Itgav Traf6 Spred1 Usp8 Trpm7 Pkia Itch Nceh1 Ufm1 Dclk1 Eif2a Asph Epha7 Prkaa2 Ptpn12 Clock Ate1 Galnt7 Nedd4 Fem1b Ccdc88a Ogt Rsrc1 Tiparp G2e3 Fbxl21 Zdhhc17 Rnf13 Cab39 Atg5 Otud7b Lpar1 Zdhhc2 Abhd1…
3.11692e-26	399	3534	Protein modification process	Dazap2 Galnt1 Kat2b Braf Prkacb Insr Cdc42 Yes1 Ppp1cb Ube2a Map2k3 Sgk1 Igf1 Mapk9 Ube2g1 Spag9 Eif2s1 Atxn3 Smad5 Agtpbp1 Mapk8 Oxr1 Angpt1 Eif2ak2 Impact Smad2 Zdhhc6 Ube3a Lypla1 Sumo1 Rnf2 Itgav Traf6 Spred1 Usp8 Trpm7 Pkia Itch Nceh1 Ufm1 Dclk1 Eif2a Asph Epha7 Prkaa2 Ptpn12 Clock Ate1 Galnt7 Nedd4 Fem1b Ccdc88a Ogt Rsrc1 Tiparp G2e3 Fbxl21 Zdhhc17 Rnf13 Cab39 Atg5 Otud7b Lpar1 Zdhhc2 Abhd1…
4.39087e-25	407	3683	Macromolecule modification	Dazap2 Galnt1 Kat2b Braf Prkacb Insr Cdc42 Yes1 Ppp1cb Ube2a Map2k3 Sgk1 Igf1 Mapk9 Ube2g1 Spag9 Eif2s1 Atxn3 Smad5 Agtpbp1 Mapk8 Oxr1 Angpt1 Eif2ak2 Impact Smad2 Zdhhc6 Ube3a Lypla1 Sumo1 Rnf2 Itgav Traf6 Spred1 Usp8 Trpm7 Pkia Itch Nceh1 Ufm1 Dclk1 Eif2a Asph Epha7 Prkaa2 Ptpn12 Clock Ate1 Galnt7 Nedd4 Fem1b Ccdc88a Ogt Rsrc1 Tiparp G2e3 Fbxl21 Zdhhc17 Rnf13 Cab39 Atg5 Otud7b Lpar1 Zdhhc2 Abhd1…
4.40132e-23	276	2215	Cellular localization	Napb Ift80 Ift74 Vps35 Shh Rala Ywhah Vps26a Pafah1b1 Erbin Angpt1 Twf1 Rhoq Syt4 Pkia Kpna4 Dclk1 Ahcyl1 Srsf10 Khdrbs1 Epha5 Uso1 Edem1 Arl8b Zfand6 Arl6ip1 Gpm6b Map4 Rsrc1 Myo5a Syt1 Bag4 Pik3r1 Gpr158 Vsnl1 Nlgn1 Ipo7 Ywhaq Cav2 Mid2 Ddx3x Calm1 Braf Cse1l Stard3nl Sri Ranbp2 Cul3 Rab11a Hnrnpa2b1 Ufd1 Apc Cdc42 Kif5b M6pr Evi5 Tmem87b Tsg101 Golga7 Lamp2 Cacnb4 Rhot1 Rab5a Pex3 Igf1 Pex13 E…
1.68722e-20	457	4524	Cellular protein metabolic process	Cul1 Skp1a Dazap2 Galnt1 Kat2b Braf Prkacb Insr Cdc42 Dnajb9 Yes1 Ppp1cb Ube2a Map2k3 Sgk1 Igf1 Mapk9 Ube2g1 Spag9 Eif2s1 Atxn3 Smad5 Agtpbp1 Mapk8 Oxr1 Angpt1 Eif3e Eif2ak2 Impact Smad2 Il33 Zdhhc6 Ube3a Xiap Lypla1 Sumo1 Rnf2 Dnajc10 Itgav Traf6 Ubr1 Spred1 Usp8 Trpm7 Pkia Itch Nceh1 Ufm1 Dclk1 Eif2a Asph Ube2j1 Epha7 Prkaa2 Ptpn12 Clock Edem1 Ate1 Galnt7 Nedd4 Fem1b Ccdc88a Ogt Rsrc1 Tiparp G2…
2.35238e-17	187	1417	Cellular macromolecule localization	Shh Ywhah Erbin Angpt1 Twf1 Rhoq Pkia Kpna4 Dclk1 Ahcyl1 Uso1 Edem1 Zfand6 Arl6ip1 Gpm6b Bag4 Pik3r1 Gpr158 Nlgn1 Ipo7 Ywhaq Mid2 Ddx3x Braf Cse1l Ranbp2 Rab11a Hnrnpa2b1 Ufd1 Apc Cdc42 Kif5b M6pr Golga7 Lamp2 Cacnb4 Pex3 Igf1 Pex13 Erlec1 Hspa4 Rtn4 Rock2 Snx13 Bcap29 Rab10 Sec23a Mpp5 Atp6v1d Tmed10 Hsp90aa1 Slf1 Ap3m1 Kpna3 Pibf1 Rad21 Eny2 Dlg1 Fyttd1 Kpna1 Vapa Cript Rab27b Napg Jak2 Tnks2 L…
2.49941e-17	186	1409	Cellular protein localization	Shh Ywhah Erbin Angpt1 Twf1 Rhoq Pkia Kpna4 Dclk1 Ahcyl1 Uso1 Edem1 Zfand6 Arl6ip1 Gpm6b Bag4 Pik3r1 Gpr158 Nlgn1 Ipo7 Ywhaq Mid2 Ddx3x Braf Cse1l Ranbp2 Rab11a Hnrnpa2b1 Ufd1 Apc Cdc42 Kif5b M6pr Golga7 Lamp2 Cacnb4 Pex3 Igf1 Pex13 Erlec1 Hspa4 Rtn4 Rock2 Snx13 Bcap29 Rab10 Sec23a Mpp5 Atp6v1d Tmed10 Hsp90aa1 Slf1 Ap3m1 Kpna3 Pibf1 Rad21 Eny2 Dlg1 Fyttd1 Kpna1 Vapa Cript Rab27b Napg Jak2 Tnks2 L…
7.62893e-17	405	4049	Transport	Abca5 Rhoq Atp1b1 Napb Ift80 Ift74 Vps35 Shh Slc1a2 Slc1a3 M6pr Rala Yes1 Steap2 Rab5a Ywhah Stxbp5 Slc6a15 Vps26a Tspan13 Cbll1 Pafah1b1 Erbin Ppp3cb Slc39a14 Angpt1 Shisa9 Stxbp5l Adcyap1 Syt4 Spire1 Megf10 Il33 Fgf14 Itgb1 Itgav Traf6 Trpm7 Pkia Kpna4 Ahcyl1 Sh3gl2 Srsf10 Khdrbs1 Vamp3 Epha5 Uso1 Edem1 Arl8b Mef2a Zfand6 Arl6ip1 Cask Gpm6b Nedd4 Rsrc1 Myo5a Arl6ip5 Syt1 Slc39a12 Slc30a1 Slc24a…
7.62893e-17	265	2325	Protein localization	Shh M6pr Ywhah Erbin Angpt1 Twf1 Stxbp5l Rhoq Adcyap1 Il33 Nckap1 Itgav Traf6 Pkia Kpna4 Dclk1 Nbea Ahcyl1 Epha5 Uso1 Edem1 Zfand6 Arl6ip1 Gpm6b Bag4 Pik3r1 Gpr158 Rapgef4 Vsnl1 Pclo Nlgn1 Ipo7 Ywhaq Mid2 Ddx3x Braf Cse1l Ranbp2 Rab11a Hnrnpa2b1 Ufd1 Apc Cdc42 Kif5b Tsg101 Golga7 Lamp2 Cacnb4 Rab5a Stxbp5 Pex3 Lin7a Igf1 Vps26a Pex13 Erlec1 Hspa4 Rtn4 Rock2 Snx13 Bcap29 Rab10 Rabep1 Scfd1 Sec23a …
7.62893e-17	415	4181	Establishment of localization	Abca5 Rhoq Atp1b1 Napb Ift80 Ift74 Vps35 Shh Slc1a2 Slc1a3 M6pr Rala Yes1 Steap2 Rab5a Ywhah Stxbp5 Slc6a15 Vps26a Tspan13 Cbll1 Pafah1b1 Erbin Ppp3cb Slc39a14 Angpt1 Shisa9 Stxbp5l Adcyap1 Syt4 Spire1 Megf10 Il33 Fgf14 Itgb1 Itgav Traf6 Trpm7 Pkia Kpna4 Ahcyl1 Sh3gl2 Srsf10 Khdrbs1 Vamp3 Epha5 Uso1 Edem1 Arl8b Mef2a Zfand6 Arl6ip1 Cask Gpm6b Nedd4 Map4 Rsrc1 Myo5a Arl6ip5 Syt1 Slc39a12 Slc30a1 S…
7.62893e-17	131	859	Protein modification by small protein conjugation or removal	Ube2a Ube2g1 Atxn3 Ube3a Sumo1 Rnf2 Traf6 Usp8 Itch Ufm1 Nedd4 Fem1b Ogt G2e3 Fbxl21 Rnf13 Otud7b Wwp1 Usp46 Ube4a Ube2n Usp32 Ranbp2 Cul3 Crbn Fbxo11 Tgfbr1 Pten Tsg101 Gid4 Trim37 Cand1 Rnft1 Cbll1 Cdc27 Hsp90aa1 Hecw1 Atg10 Trim23 Angpt1 Eny2 Senp5 Fbxl17 Pja2 Cul2 Wac Rnf138 Zfp91 Tnks2 Btbd1 Arih1 Gnl3l Xiap Desi2 Ube2e3 Trim44 Cops2 Ubr1 Trim2 Ube2j1 Dnaja1 Rnf11 Klhl7 Cul1 Uba3 Zranb1 Usp9…
1.86142e-16	315	2944	Phosphorus metabolic process	Dlat Dld Dazap2 Kat2b Ocrl Braf Ranbp2 Prkacb Insr Cdc42 Yes1 Ppp1cb Adss Pank3 Map2k3 Sgk1 Igf1 Mapk9 Nampt Spag9 Sgpp1 Eif2s1 Smad5 Mapk8 Angpt1 Eif2ak2 Impact Smad2 Itgav Spred1 Trpm7 Pkia Nceh1 Dclk1 Eif2a Epha7 Prkaa2 Ptpn12 Ccdc88a Rsrc1 Cab39 Bag4 Lpar1 Cept1 Pik3r1 Inpp5f Mapk6 Rap2c Prkcb Prkg1 Camk2d Adam10 Ghr Bcl2 Chpt1 Gdpd1 Mapk1 Dusp22 Ccnyl1 Ttbk2 Gnai3 Cav2 Atp5f1 Ddx3x Fmr1 Calm…
6.43497e-16	199	1604	Establishment of localization in cell	Napb Ift80 Ift74 Vps35 Ywhah Vps26a Pafah1b1 Erbin Angpt1 Syt4 Pkia Kpna4 Ahcyl1 Srsf10 Khdrbs1 Epha5 Uso1 Edem1 Arl8b Zfand6 Arl6ip1 Gpm6b Map4 Rsrc1 Myo5a Syt1 Vsnl1 Nlgn1 Ipo7 Ywhaq Calm1 Cse1l Stard3nl Sri Ranbp2 Cul3 Rab11a Hnrnpa2b1 Ufd1 Cdc42 Kif5b M6pr Evi5 Tmem87b Tsg101 Lamp2 Cacnb4 Rhot1 Rab5a Pex3 Igf1 Pex13 Erlec1 Hspa4 Snx13 Bcap29 Rab10 Spag9 Scfd1 Sec23a Hif1a Tmed10 Hsp90aa1 Rhob…
7.3924e-16	311	2925	Phosphate-containing compound metabolic process	Dlat Dld Dazap2 Kat2b Ocrl Braf Ranbp2 Prkacb Insr Cdc42 Yes1 Ppp1cb Adss Pank3 Map2k3 Sgk1 Igf1 Mapk9 Nampt Spag9 Sgpp1 Eif2s1 Smad5 Mapk8 Angpt1 Eif2ak2 Impact Smad2 Itgav Spred1 Trpm7 Pkia Nceh1 Dclk1 Eif2a Epha7 Prkaa2 Ptpn12 Ccdc88a Rsrc1 Cab39 Bag4 Lpar1 Cept1 Pik3r1 Inpp5f Mapk6 Rap2c Prkcb Prkg1 Camk2d Adam10 Ghr Bcl2 Chpt1 Gdpd1 Mapk1 Dusp22 Ccnyl1 Ttbk2 Gnai3 Cav2 Atp5f1 Ddx3x Fmr1 Calm…
1.20857e-15	286	2631	Macromolecule localization	Abca5 Shh M6pr Ywhah Erbin Angpt1 Twf1 Stxbp5l Rhoq Adcyap1 Il33 Nckap1 Itgav Traf6 Pkia Kpna4 Dclk1 Nbea Ahcyl1 Khdrbs1 Epha5 Uso1 Edem1 Zfand6 Arl6ip1 Gpm6b Bag4 Pik3r1 Gpr158 Rapgef4 Vsnl1 Pclo Nlgn1 Ipo7 Ywhaq Mid2 Ddx3x Braf Cse1l Ranbp2 Rab11a Hnrnpa2b1 Ufd1 Apc Cdc42 Kif5b Tsg101 Golga7 Lamp2 Cacnb4 Pitpna Rab5a Stxbp5 Pex3 Lin7a Igf1 Vps26a Osbpl8 Pex13 Erlec1 Hspa4 Rtn4 Rock2 Snx13 Bcap2…
2.13315e-14	159	1217	Intracellular transport	Ift80 Ift74 Vps35 Ywhah Vps26a Pafah1b1 Erbin Angpt1 Pkia Kpna4 Ahcyl1 Srsf10 Khdrbs1 Uso1 Edem1 Arl8b Zfand6 Arl6ip1 Rsrc1 Myo5a Syt1 Ipo7 Ywhaq Cse1l Ranbp2 Cul3 Rab11a Hnrnpa2b1 Ufd1 Cdc42 Kif5b M6pr Evi5 Tmem87b Tsg101 Lamp2 Cacnb4 Rhot1 Rab5a Pex3 Igf1 Pex13 Erlec1 Hspa4 Snx13 Bcap29 Rab10 Spag9 Scfd1 Sec23a Hif1a Tmed10 Hsp90aa1 Rhobtb3 Col4a3bp Ap3m1 Kpna3 Eny2 Tbc1d23 Dnm1l Fyttd1 Snx4 Kp…
3.71677e-14	174	1389	Cell projection organization	Ift80 Ift74 Braf Shh Cdc42 Ywhah Fgd4 Ermn Nckap1 Epha7 Epha5 Chl1 Ttyh1 Gpm6a Tmem30a Ccdc88a Lpar1 Negr1 Bcl2 Rit2 Abi1 Ntng1 Btbd3 Ptprz1 Rap1a Fmr1 Ocrl Cul3 Pkn2 Rab11a Ulk2 Eif4g2 Apc Arpc5 Rala Pdcl Pten Map2 Rab5a Trove2 Hdac2 Actr2 Rtn4 Pafah1b1 Atl1 Atp6v1d Hsp90aa1 Arf4 Pibf1 Fopnl Dnm1l Vapa Rhoq Adcyap1 Syt4 Jak2 Ube3a Actr3 Skil Dhx36 Pfn2 Serpini1 Fam92a Cd38 Tmem106b Usp9x Cul4b A…
4.53132e-14	457	4904	Positive regulation of cellular process	Cxadr Lmx1a Dazap2 Kat2b Braf Shh Ranbp2 Nfat5 Etv1 Cdc42 Kif5b Tgfbr1 Nfib Yes1 Serinc3 Map2k3 Stxbp5 Igf1 Osbpl8 Nfyb Ppp4r3b Cbll1 Spag9 Hif1a Hsp90aa1 Smad5 Bmpr1a Bnip3l Angpt1 Fam49b Ppara Tfrc Zfp148 Smad2 Il33 Cfh Nucks1 Pou2f1 Nckap1 Spred1 Mal Tpd52 Dhx36 Eif2a Trp53inp1 Epha7 Ift74 Vamp3 Cd38 Ppargc1a Slc30a9 Clock Cnbp Edem1 St8sia1 Mef2a Cnot7 Tmem30a Ccdc88a Gpbp1 Tcea1 Lrrn1 Brinp3…
1.01016e-13	240	2166	Nervous system development	Lmx1a Braf Shh Ywhah Igf1 Rtn4 Il33 Epha7 Epha5 Chl1 Gpm6a Tmem30a Ccdc88a Pds5b Lrrn1 Brinp3 Lrrn3 Lpar1 Negr1 Nrg3 Flrt2 Flrt3 Bcl2 Rit2 Abi1 Ntng1 Btbd3 Nlgn1 Ptprz1 Rap1a Lrrtm2 Gnai3 Hnrnpd Fmr1 Pafah1b2 Etv1 Rab11a Ulk2 Eif4g2 Cdc42 Kif5b Fzd3 Arpc5 Pten Map2 Rarb Hdac2 Actr2 Pafah1b1 Aspa Snw1 Atl1 Mpp5 Hsp90aa1 Agtpbp1 Kif2a Arf4 Oxct1 Sdc2 Rida Tbc1d23 Dnm1l Chodl D16Ertd472e Synj1 Vapa …
1.3846e-13	111	744	Protein modification by small protein conjugation	Ube2a Ube2g1 Ube3a Sumo1 Rnf2 Traf6 Itch Ufm1 Nedd4 Fem1b Ogt G2e3 Fbxl21 Rnf13 Wwp1 Ube4a Ube2n Ranbp2 Cul3 Crbn Fbxo11 Tgfbr1 Pten Tsg101 Gid4 Trim37 Cand1 Rnft1 Cbll1 Cdc27 Hsp90aa1 Hecw1 Atg10 Trim23 Angpt1 Fbxl17 Pja2 Cul2 Wac Rnf138 Zfp91 Tnks2 Btbd1 Arih1 Gnl3l Xiap Ube2e3 Trim44 Ubr1 Trim2 Ube2j1 Dnaja1 Rnf11 Klhl7 Cul1 Uba3 Cul4b Nae1 Ube2q2 Trim33 Asb13 Trim36 Kctd9 Zyg11b Fbxo33 Dcaf10…
2.66605e-13	251	2318	Regulation of cellular component organization	Stk38l Braf Tsg101 Ywhah Igf1 Gna13 Cbll1 Twf1 Rhoq Impact Hdgfl3 Ermn Nckap1 Asph Epha7 Sh3gl2 Epha5 Tmem30a Ccdc88a Lrrn1 Togaram1 Lrrn3 Higd1a Lpar1 Rhou Negr1 Fmn1 Shroom2 Flrt2 Plcb1 Flrt3 Rit2 Nlgn1 Rap1a Lrrtm2 Nap1l2 Cav2 Kat2b Ddx3x Fmr1 Cul3 Crbn Insr Eif4g2 Apc Cdc42 Kif5b Tgfbr1 Arpc5 Rala Lnpk Pten Mertk Naf1 Capza2 Dstn Taok1 Crk Rab5a Trim37 Hdac2 Cand1 Actr2 Rtn4 Rock2 Cdc27 Pafah…
3.30298e-13	168	1358	Plasma membrane bounded cell projection organization	Ift80 Ift74 Braf Shh Cdc42 Ywhah Fgd4 Nckap1 Epha7 Epha5 Chl1 Ttyh1 Gpm6a Tmem30a Ccdc88a Lpar1 Negr1 Bcl2 Rit2 Abi1 Ntng1 Btbd3 Ptprz1 Rap1a Fmr1 Ocrl Rab11a Ulk2 Eif4g2 Apc Arpc5 Rala Pten Map2 Rab5a Hdac2 Actr2 Rtn4 Pafah1b1 Atl1 Atp6v1d Hsp90aa1 Arf4 Pibf1 Dnm1l Vapa Rhoq Adcyap1 Syt4 Jak2 Ube3a Actr3 Skil Dhx36 Pfn2 Serpini1 Fam92a Cd38 Tmem106b Usp9x Cul4b Acsl4 Pak3 Pcm1 Vps35 Rdx Nedd4 Sy…
8.9091e-13	55	254	Dendrite development	Ywhah Abi1 Btbd3 Fmr1 Eif4g2 Map2 Hdac2 Actr2 Arf4 Dnm1l Ube3a Dhx36 Tmem106b Acsl4 Pak3 Opa1 Lpar1 Dnm3 Adam10 Nlgn1 Crk Pak2 Vldlr Itgb1 Dclk1 Mapk6 Cdc42 Pten Pafah1b1 Mapk8 Sdc2 D16Ertd472e Spire1 Hprt Abi2 Caprin1 Elavl4 Wasl Mcf2 Nedd4 Uba6 Zfp365 Fam206a Picalm Prex2 Prkg1 Slc9a6 Sgk1 Strn Actr3 Epha5 Mef2a Cask Rapgef4 Ptprz1
9.99023e-13	104	697	Protein ubiquitination	Ube2a Ube2g1 Ube3a Rnf2 Traf6 Itch Nedd4 Fem1b Ogt G2e3 Fbxl21 Rnf13 Wwp1 Ube4a Ube2n Cul3 Crbn Fbxo11 Tgfbr1 Pten Tsg101 Gid4 Trim37 Cand1 Rnft1 Cbll1 Cdc27 Hsp90aa1 Hecw1 Trim23 Angpt1 Fbxl17 Pja2 Cul2 Wac Rnf138 Zfp91 Tnks2 Btbd1 Arih1 Gnl3l Xiap Ube2e3 Trim44 Ubr1 Trim2 Ube2j1 Dnaja1 Rnf11 Klhl7 Cul1 Cul4b Ube2q2 Trim33 Asb13 Trim36 Kctd9 Zyg11b Fbxo33 Dcaf10 Rnf38 Uba6 Skp1a Klhl13 Anapc10 R…
1.71333e-12	128	949	Neuron projection development	Braf Shh Ywhah Epha7 Epha5 Chl1 Gpm6a Tmem30a Ccdc88a Lpar1 Negr1 Bcl2 Rit2 Abi1 Ntng1 Btbd3 Ptprz1 Rap1a Fmr1 Rab11a Ulk2 Eif4g2 Pten Map2 Hdac2 Actr2 Rtn4 Pafah1b1 Atl1 Arf4 Dnm1l Vapa Adcyap1 Syt4 Jak2 Ube3a Skil Dhx36 Serpini1 Cd38 Tmem106b Usp9x Cul4b Acsl4 Pak3 Nedd4 Syt1 Zfp365 Opa1 Fig4 Cbfa2t2 Dnm3 Setx Cnr1 Dmd Flrt3 Adam10 Cntn1 Dcc Slc9a6 Nlgn1 Cntn4 Lgi1 Arfgef1 Zfp804a Crk Pak2 Chod…
1.76867e-12	365	3797	Regulation of biosynthetic process	Bmpr1a Nucks1 C1d Kat2b Gmcl1 Shh Nfat5 Etv1 Nfib Tsg101 Lcorl Rarb Igf1 Nfyb Ppp4r3b Id2 Hif1a Eif2s1 Yy1 Hsp90aa1 Smad5 Nr1d2 Ppara Zfp148 Twsg1 Impact Smad2 Il33 Sumo1 Pou2f1 Lmx1a Sp3 Cops2 Pkia Skil Dhx36 Eif2a Ift74 Khdrbs1 Ppargc1a Slc30a9 Clock Foxp2 Cnbp Mef2a Rbbp7 Cnot7 Smarca5 Gpbp1 Tcea1 Mitf Otud7b Cbfa2t2 Rbpj Rbms3 Zfp704 Rc3h1 Dhx33 Rfx3 Wwp1 Pik3r1 Csrnp3 Zfp322a Plcb1 Bmpr1b Pb…
2.32177e-12	359	3727	Regulation of cellular biosynthetic process	Bmpr1a Nucks1 C1d Kat2b Gmcl1 Shh Nfat5 Etv1 Nfib Tsg101 Lcorl Rarb Igf1 Nfyb Ppp4r3b Id2 Hif1a Eif2s1 Yy1 Hsp90aa1 Smad5 Nr1d2 Ppara Zfp148 Twsg1 Impact Smad2 Il33 Sumo1 Pou2f1 Lmx1a Sp3 Cops2 Pkia Skil Dhx36 Eif2a Ift74 Khdrbs1 Ppargc1a Slc30a9 Clock Foxp2 Cnbp Mef2a Rbbp7 Cnot7 Smarca5 Gpbp1 Tcea1 Mitf Otud7b Cbfa2t2 Rbpj Rbms3 Zfp704 Rc3h1 Dhx33 Rfx3 Wwp1 Pik3r1 Csrnp3 Zfp322a Plcb1 Bmpr1b Pb…
2.47733e-12	151	1203	Vesicle-mediated transport	Napb Vps35 Shh Rala Rab5a Stxbp5 Vps26a Cbll1 Ppp3cb Stxbp5l Spire1 Megf10 Itgb1 Itgav Sh3gl2 Vamp3 Syt1 Picalm Inpp5f Rapgef4 Vsnl1 Pclo Gnai3 Cav2 Fmr1 Stard3nl Cul3 Rab11a Kif5b Evi5 Pten Tmem87b Mertk Tsg101 Golga7 Steap2 Cnih1 Cacnb4 Lin7a Bcap29 Rab10 Rabep1 Spag9 Scfd1 Sec23a Gdi2 Tmed10 Exoc2 Rhobtb3 Ap3m1 Arf4 Angpt1 Tbc1d23 Dnm1l Tfrc Snx4 Synj1 Vapa Prepl Syt4 Mal2 Rab27b Napg Rtn3 Vld…
2.69237e-12	314	3155	Organelle organization	Spin1 Ift80 Ift74 Kat2b Map2 Dstn Igf1 Pum2 Tmed10 Twf1 Rtn3 Hdgfl3 Rnf2 Ermn Nckap1 Trpm7 Dhx36 Vamp3 Epha5 Brdt Zfand6 Smarca5 Map4 Map9 Diaph2 Togaram1 Higd1a Lpar1 Rhou Fmn1 Shroom2 Plcb1 Bcl2 Nsd2 Pclo Cfl2 Nlgn1 Nap1l2 Gnai3 Cav2 Ddx3x Fmr1 Ocrl Cul3 Rab11a Insr Apc Sfmbt1 Cdc42 Kif5b Arpc5 Rala Lnpk Tsg101 Naf1 Capza2 Ube2a Pls3 Taok1 Suz12 Rhot1 Crk Trim37 Akt3 Hdac2 Pex3 Actr2 Pex13 Hspa…
2.96646e-12	100	671	Protein localization to organelle	Shh Angpt1 Pkia Kpna4 Dclk1 Zfand6 Ipo7 Mid2 Ddx3x Ranbp2 Rab11a Apc M6pr Lamp2 Cacnb4 Pex3 Igf1 Pex13 Hspa4 Rtn4 Rock2 Rab10 Atp6v1d Hsp90aa1 Slf1 Kpna3 Pibf1 Rad21 Kpna1 Vapa Cript Jak2 Tnks2 Lztfl1 Gnl3l Cct8 Gdap1 Tram1 Mff Mapre1 Snx16 Sec62 Rab33b Ssr3 Ubxn2b Dnaja1 Rab6a Dkc1 Pcm1 Rdx Nedd4 Tmem30a Atr Ccdc88a Arl5a Skp1a Srp72 Cnep1r1 Rab8b Bag4 Gcc2 Snx10 Otud7b Pex2 Pik3r1 Dhx9 Setd2 Dt…

## Sheet: GOBiological_hypoRayetal
GO (Biological Process) enrichment analysis for genes that changed expression in any pairwise comparison in Ray et al (Supplemental Table24 in Ray et al)--HYPOTHALAMUS
top 30 most significant terms; analysis done with Ensembl_IDs from Supplemental Table 2 lists
Enrichment FDR	Genes in list	Total genes	Functional Category	Genes
3.45272e-47	407	4400	System development	Lmx1a Notch1 Reln Sox9 Crabp2 Nes Mef2c Bmp7 Gata2 Vtn Ctgf Socs2 Id2 Fos Bmp4 Ednrb Npr3 Bcl6 Tnfrsf12a Vegfa Calcr Adam8 Fn1 Myoc Vim Nr4a2 Olfm1 Fbn1 Cyr61 Lmo4 Mfsd2a Hpca Ptn Nr2f2 Sfrp1 Fgfr1 Thy1 Drd2 Zic1 Trf Lama1 Wnt6 Barhl2 Inpp5j Plk5 Twist1 Fgf1 H2-Aa Wnt4 Sema7a Six3 Bmp6 Nrn1 Prdm16 Olig2 Nbl1 Mustn1 Asb4 Zfp536 Basp1 Slitrk6 Cd24a Hes5 Osr1 Mlf1 Foxc1 Six1 Sema5b Lamb2 Yap1 Lrtm2 …
1.26755e-43	428	4912	Multicellular organism development	Lmx1a Notch1 Reln Sox9 Crabp2 Nes Mef2c Bmp7 Gata2 Vtn Ctgf Socs2 Id2 Fos Pitx1 Bmp4 Ednrb Npr3 Bcl6 Tnfrsf12a Vegfa Calcr Adam8 Eya1 Fn1 Myoc Vim Nr4a2 Olfm1 Fbn1 Cyr61 Lmo4 Reck Mfsd2a Hpca Pxn Ptn Nr2f2 Sfrp1 Fgfr1 Thy1 Drd2 Zic1 Trf Lama1 Wnt6 Barhl2 Inpp5j Plk5 Twist1 Fgf1 H2-Aa Wnt4 Sema7a Six3 Bmp6 Nrn1 Prdm16 Olig2 Nbl1 Mustn1 Asb4 Zfp536 Basp1 Slitrk6 Cd24a Hes5 Osr1 Mlf1 Foxc1 Six1 Sema…
1.70453e-36	313	3273	Animal organ development	Lmx1a Notch1 Sox9 Bmp7 Gata2 Ctgf Id2 Fos Bmp4 Vegfa Calcr Adam8 Myoc Vim Fbn1 Cyr61 Lmo4 Mfsd2a Hpca Ptn Nr2f2 Sfrp1 Fgfr1 Zic1 Trf Wnt6 Twist1 Fgf1 H2-Aa Wnt4 Sema7a Six3 Olig2 Reln Mustn1 Basp1 Osr1 Mlf1 Foxc1 Six1 Yap1 Maf Tcim H2-K1 Cxcl12 Tnfrsf11b Zbtb16 Lgals1 Cebpd H2-Ab1 Foxd1 Ccl19 Cdh1 Mmp14 Col1a1 Axl Klf4 Mef2c Kit Htra1 Hfe Id3 Slc38a3 Cdh23 Aldh1a2 Vtn Crhr1 Dcn Efemp1 Sdc1 Gh Six…
5.61555e-35	289	2953	Regulation of multicellular organismal process	Lmx1a Notch1 Flna Sox9 Lgals9 Crabp2 Mef2c Bmp7 Gata2 Ptgds Lbp Socs2 Fos Bmp4 Ednrb Bcl6 Zbtb20 Tfrc Tnfrsf12a Vegfa Twsg1 Cd74 Adam8 Fn1 Olfm1 Fbn1 Adgra2 Sfrp1 Fgfr1 Drd2 Trf Mif Inpp5j Plk5 Twist1 Fgf1 H2-Aa Wnt4 Sema7a Six3 Bmp6 Olig2 Nbl1 Reln Mustn1 Asb4 Zfp536 Slitrk6 Cd24a Hes5 Six1 Myh7 Yap1 Lrtm2 Tcim Chn1 H2-K1 Tnfrsf11b Zbtb16 Cebpd Syndig1 Lrrc32 Ccl19 Col1a1 Axl Klf4 Kit Hfe Atp1a2…
1.0706e-32	250	2436	Anatomical structure morphogenesis	Notch1 Crabp2 Kit Bmp7 Ctgf Id2 Pitx1 Bmp4 Tnfrsf12a Vegfa Adam8 Eya1 Fn1 Olfm1 Pxn Sfrp1 Fgfr1 Thy1 Wnt6 Twist1 Fgf1 Wnt4 Sema7a Six3 Nrn1 Nbl1 Reln Asb4 Slitrk6 Sema5b Junb Chn1 Tnfrsf11b Foxd1 Sox9 Mmp14 Col6a1 Col1a1 Klf4 Hif3a Htra1 Fbln1 Gata2 Nfe2l2 Cntnap1 Vtn Dcn Efemp1 Sdc1 Sfrp4 Dab2 Myo10 Thbs2 Smoc2 Xdh Pdgfrb Anxa1 Syt2 Lamc1 Ptpn14 Lamb3 Myoc Col5a1 Fbn1 Notch2 Pitx2 Ecm1 Cyr61 Tnc…
2.80906e-32	285	2998	Response to organic substance	Sox9 Col6a1 Col1a1 Klf4 Mef2c Kit Htra1 Atp1a2 Id3 Bmp7 Abca1 Nfe2l2 Slc2a4 Lsp1 Cxcl16 Esr1 Ctgf Timp3 Ddit4 Gh Nr1d1 Per1 Ryr2 Slc6a3 Crhbp Bmp4 Myc Tuba1b Nr4a1 Twsg1 Cd74 Stip1 Ifitm3 Col3a1 Mrc1 Vim Nr4a2 Gsn Notch1 Ecm1 Trp53inp1 Gbp3 Gbp2 Nr4a3 Alad Pxn Col1a2 Tead2 Gpr83 Drd2 Ctsh Ifit1 H2-Aa Icam1 Tob1 Egr1 Bmp6 Lats1 Ramp3 Nbl1 Fbxo2 Cdc42ep4 Nrep Foxo1 Wfikkn2 Bst2 Cd24a Msx1 Ghsr Cite…
2.80906e-32	334	3800	Cell differentiation	Lmx1a Prdm16 Sox9 Fndc5 Klf4 Crabp2 Mef2c Id3 Bmp7 Gata2 Vtn Slc2a4 Esr1 Lama4 Ctgf Socs2 Sdc1 Fos Bmp4 Ednrb Bcl6 Nr4a1 Tnfrsf12a Vegfa Calcr Sik1 Twsg1 Adam8 Eya1 Fn1 Rgs2 Lamb3 Myoc Vim Nr4a2 Olfm1 Notch1 Fbn1 Edn3 Cyr61 Lmo4 Nr4a3 A2m Nr2f2 Sfrp1 Drd2 Trf Lama1 Jdp2 Barhl2 Inpp5j Plk5 Twist1 H2-Aa Wnt4 Sema7a Six3 Bmp6 Nrn1 Olig2 Nbl1 Reln Mustn1 Asb4 Zfp536 Insig1 Basp1 Slitrk6 Sox18 Cd24a H…
3.09805e-31	260	2647	Cellular response to chemical stimulus	Sox9 Col6a1 Col1a1 Fosb Mef2c Kit Htra1 Atp1a2 Id3 Bmp7 Slc41a1 Abca1 Nfe2l2 Kdm6b Slc2a4 Lsp1 Cxcl16 Esr1 Ctgf Timp3 Ddit4 Id2 Gh Fos Ryr2 Crhbp Bmp4 Myc Tuba1b Nr4a1 Twsg1 Cd74 Stip1 Adam8 Ifitm3 Col3a1 Mrc1 Vim Nr4a2 Gsn Notch1 Ecm1 Trp53inp1 Gbp3 Gbp2 Nr4a3 Alad Spp1 Pxn Col1a2 Tead2 Sfrp1 Mt1 Pde4a Ifit1 Icam1 Tob1 Higd1a Egr1 Bmp6 Lats1 Ramp3 Nbl1 Cdc42ep4 Nrep Foxo1 Wfikkn2 Msx1 Ghsr Jun J…
4.5047e-31	341	3976	Cellular developmental process	Lmx1a Prdm16 Sox9 Fndc5 Klf4 Crabp2 Mef2c Kit Id3 Bmp7 Gata2 Vtn Slc2a4 Esr1 Lama4 Ctgf Socs2 Sdc1 Fos Bmp4 Ednrb Bcl6 Nr4a1 Tnfrsf12a Vegfa Calcr Sik1 Twsg1 Adam8 Eya1 1500015O10Rik Fn1 Rgs2 Lamb3 Myoc Vim Nr4a2 Olfm1 Notch1 Fbn1 Edn3 Cyr61 Lmo4 Nr4a3 A2m Nr2f2 Sfrp1 Drd2 Trf Lama1 Jdp2 Barhl2 Inpp5j Plk5 Twist1 H2-Aa Wnt4 Sema7a Six3 Bmp6 Nrn1 Olig2 Nbl1 Prelp Reln Mustn1 Asb4 Zfp536 Insig1 Bas…
2.09748e-29	304	3429	Regulation of biological quality	Flna Cyp26b1 Lgals9 Crabp2 Kit Aldh1a2 Gata2 Eya2 Ntsr2 Ryr2 Crhbp Bmp4 Tfrc Tnfrsf12a Vegfa Calcr Syt7 Got1 Adam8 Snca Slc9a2 Fn1 Olfm1 Gsn Pear1 Npy Mt1 Trf Mif Rims4 Nov Icam1 Sema7a Nbl1 Reln Qrfp Foxo1 Slitrk6 Rapgef4 Prkcb Aldh1a1 Vsnl1 Lrtm2 Rxfp3 Ano6 Insyn1 Syndig1 Vwf Grin2d Klf4 Cp Calb2 Trh Fbln1 Hfe Atp1a2 Sptbn4 Slc41a1 Slc9a5 Abca1 Nfe2l2 Slc12a7 Slc2a4 Crhr1 Scn1b Calm3 Dcn Micu1 …
1.3417e-28	222	2166	Nervous system development	Lmx1a Reln Crabp2 Nes Mef2c Bmp7 Vtn Socs2 Bmp4 Ednrb Bcl6 Tnfrsf12a Fn1 Nr4a2 Olfm1 Notch1 Lmo4 Mfsd2a Nr2f2 Sfrp1 Drd2 Zic1 Lama1 Barhl2 Inpp5j Plk5 Sema7a Six3 Bmp6 Nrn1 Prdm16 Olig2 Nbl1 Zfp536 Slitrk6 Cd24a Hes5 Sema5b Lamb2 Lrtm2 Chn1 H2-K1 Cxcl12 Zbtb16 Syndig1 Prdm12 Cdh1 Mmp14 Vwf Kit Id3 Slc38a3 Myt1 Cdh23 Aldh1a2 Gata2 Nfe2l2 Cntnap1 Crhr1 Lama2 Nefh Btg2 Gh Gfap Otp Nefm Nefl Sdc2 Myc…
2.0865e-28	176	1512	Response to endogenous stimulus	Sox9 Col6a1 Col1a1 Mef2c Kit Htra1 Atp1a2 Bmp7 Slc2a4 Esr1 Ctgf Ddit4 Gh Nr1d1 Ryr2 Crhbp Bmp4 Nr4a1 Twsg1 Col3a1 Nr4a2 Notch1 Nr4a3 Pxn Col1a2 Gpr83 Tob1 Egr1 Bmp6 Lats1 Ramp3 Nbl1 Nrep Foxo1 Wfikkn2 Msx1 Ghsr Cited1 Socs3 Cdh1 Mmp14 Klf4 Fosb Sst Klf5 Prlr Agrp Trh Hfe Aldh1a2 Ptgds Abca1 Nfe2l2 Mtmr4 Crhr1 Calm3 Socs2 Btg2 Sdc1 Fos Prl Thrb Nefl Ednrb Dab2 Myc Rangap1 Cyc1 Smoc2 Dusp1 Nr3c1 Pd…
2.9851e-28	247	2563	Regulation of localization	Flna Lgals9 Sst Nfe2l2 Ryr2 Crhbp Ajuba Cd74 Rbp4 Snca Stom Cyr61 Lmo4 Sh3gl2 Mfge8 Adgra2 Zic1 Dclk3 Trf Mif Lgi3 Oaz1 Abca7 Twist1 Apln Nov Pacsin1 Nbl1 Mdfic Reln Bst2 Rapgef4 Vsnl1 Gpc3 Cxcl12 Lrrc32 Ccl19 Cdh1 Sox9 Mmp14 Col1a1 Axl Klf4 Mef2c Kit Trh Fbln1 Hfe Atp1a2 Fxyd5 Slc38a3 Gata2 Abca1 Vtn Crhr1 Cxcl16 Scn1b Calm3 Lama4 Lama2 Dcn Adarb1 Nefh Sdc1 Cygb Alox8 Chga Sfrp4 Bmp4 Ednrb Dab2 …
3.44519e-28	208	1976	Regulation of multicellular organismal development	Lmx1a Notch1 Sox9 Crabp2 Mef2c Bmp7 Gata2 Socs2 Fos Bmp4 Ednrb Bcl6 Tnfrsf12a Vegfa Adam8 Fn1 Olfm1 Fbn1 Sfrp1 Fgfr1 Drd2 Inpp5j Plk5 Twist1 Fgf1 H2-Aa Wnt4 Sema7a Six3 Bmp6 Olig2 Nbl1 Reln Mustn1 Asb4 Zfp536 Slitrk6 Cd24a Hes5 Six1 Yap1 Lrtm2 Tcim Chn1 H2-K1 Tnfrsf11b Zbtb16 Syndig1 Ccl19 Col1a1 Axl Klf4 Kit Nfe2l2 Lama4 Lama2 Dcn Efemp1 Gh Gfap Sfrp4 Dab2 Myc Tfrc Thbs2 Smoc2 Xdh Cd74 Anxa1 Esr…
3.44519e-28	244	2521	Regulation of developmental process	Lmx1a Notch1 Sox9 Fndc5 Klf4 Crabp2 Mef2c Kit Bmp7 Gata2 Socs2 Fos Bmp4 Ednrb Bcl6 Tnfrsf12a Vegfa Sik1 Twsg1 Adam8 Fn1 Olfm1 Fbn1 Cyr61 Sfrp1 Fgfr1 Drd2 Jdp2 Inpp5j Plk5 Twist1 Fgf1 H2-Aa Wnt4 Sema7a Six3 Bmp6 Olig2 Nbl1 Reln Mustn1 Asb4 Zfp536 Insig1 Slitrk6 Cd24a Hes5 Msx1 Six1 Junb Yap1 Socs3 Lrtm2 Tcim Chn1 H2-K1 Tnfrsf11b Zbtb16 Cebpd Syndig1 Ccl19 Col1a1 Axl Fbln1 Nfe2l2 Lama4 Lama2 Dcn Ct…
2.418e-27	217	2140	Cellular response to organic substance	Sox9 Col6a1 Col1a1 Mef2c Kit Htra1 Atp1a2 Id3 Bmp7 Abca1 Nfe2l2 Slc2a4 Lsp1 Cxcl16 Esr1 Ctgf Timp3 Ddit4 Gh Ryr2 Crhbp Bmp4 Myc Tuba1b Nr4a1 Twsg1 Cd74 Stip1 Ifitm3 Col3a1 Mrc1 Vim Nr4a2 Gsn Notch1 Ecm1 Trp53inp1 Gbp3 Gbp2 Nr4a3 Alad Pxn Col1a2 Tead2 Ifit1 Icam1 Tob1 Egr1 Bmp6 Lats1 Ramp3 Nbl1 Cdc42ep4 Nrep Foxo1 Wfikkn2 Msx1 Ghsr Prkcb Yap1 Socs3 Vsnl1 H2-Q7 H2-Ab1 Ifit3 Gm43302 Sox1 Cdh1 Axl Kl…
2.5111e-26	382	4946	Negative regulation of biological process	Hfe Tigar Sox9 Lgals9 Col1a1 Chordc1 Klf4 Klf5 Mef2c Htra1 Id3 Bmp7 Gata2 Id2 Nr1d1 Per1 Ryr2 Id4 Thrb Bmp4 Hr Ednrb Ajuba Myc Bcl6 Zbtb20 Tra2b Nr4a1 Calcr Sik1 Twsg1 Esrra Adam8 Ifitm1 Ifitm3 Gsn Notch1 Fbn1 Mdk Ecm1 Trp53inp1 Lmo4 Nr4a3 Per3 Nr2f2 Rbm3 Sfrp1 Mt1 Thy1 Dclk3 Sox10 Mif Jdp2 Inpp5j Oaz1 Plk5 Abca7 Twist1 Wnt4 Apln Nov Klf10 Tob1 Cdkn1c Sesn1 Higd1a Foxq1 Egr1 Six3 Prdm16 Olig2 Tim…
3.00964e-26	210	2075	Cell development	Lmx1a Prdm16 Crabp2 Mef2c Bmp7 Socs2 Sdc1 Bmp4 Ednrb Bcl6 Tnfrsf12a Fn1 Vim Olfm1 Notch1 Fbn1 Sfrp1 Drd2 Lama1 Inpp5j Plk5 Sema7a Six3 Bmp6 Nrn1 Olig2 Nbl1 Reln Zfp536 Slitrk6 Sox18 Cd24a Hes5 Foxc1 Sema5b Lamb2 Chn1 H2-K1 Cxcl12 Flnc Ccl19 Cdh1 Sox9 Axl Kit Fbln1 Cdh23 Gata2 Nfe2l2 Cntnap1 Nefh Btg2 Gh Gfap Nefm Nefl Myc Rgs2 Syt2 Lamc1 Myoc Odf2 Gsn Fam210b Serpini1 Notch2 Tnc Npy Ptn Ret Cpne9…
6.95496e-26	189	1778	Tissue development	Sox9 Id3 Bmp7 Ctgf Bmp4 Vegfa Anxa1 Eya1 Vim Notch1 Cyr61 Pxn Ptn Sfrp1 Fgfr1 Wnt6 Twist1 Wnt4 Six3 Bmp6 Mustn1 Basp1 Osr1 Fzd2 Foxc1 Six1 Yap1 Foxd1 Mmp14 Col6a1 Col1a1 Mef2c Aldh1a2 Vtn Eya2 Crhr1 Dcn Efemp1 Sdc1 Sfrp4 Dab2 Xdh Pdgfrb Esrra Clec3b Fn1 Rgs2 Lamb3 Ddr2 Col5a1 Gsn Ecm1 Tnc Tgfbr3 Spp1 Bmp3 Anxa4 Mgp Nr2f2 Msn Flna Mmp15 Agt Tagln Kank2 Stra6 Col12a1 Phldb2 Foxa1 Lum Fgf1 Clic4 Nov…
6.15228e-25	173	1579	Response to oxygen-containing compound	Sox9 Col6a1 Col1a1 Klf4 Mef2c Id3 Abca1 Kdm6b Slc2a4 Cxcl16 Esr1 Ddit4 Gh Per1 Slc6a3 Crhbp Nr4a1 Col3a1 Mrc1 Nr4a2 Notch1 Trp53inp1 Gbp2 Nr4a3 Col1a2 Tead2 Mt1 Drd2 Ctsh Icam1 Egr1 Ramp3 Foxo1 Ghsr Cited1 Prkcb Yap1 Socs3 Vsnl1 Cdh1 Axl Fosb Sst Klf5 Agrp Trh Atp1a2 Bmp7 Aldh1a2 Nfe2l2 Lbp Crhr1 Calm3 Dcn Ctgf Socs2 Col6a2 Btg2 Sdc1 Nr1d1 Fos Prl Nefl Ednrb Myc Rangap1 Apod Cyc1 Tra2b Dusp1 Nr3c…
3.4977e-24	273	3160	Regulation of cell communication	Lmx1a Notch1 Flna Sox9 Htra1 Rspo3 Prl Crhbp Bmp4 Ajuba Myc Twsg1 Syt7 Adam8 Snca Col3a1 Mal Ecm1 Reck Pxn Adgra2 Sfrp1 Thy1 Trf Sox10 Mif Twist1 Apln Nov Tob1 Sema7a Sesn1 Higd1a Nbl1 Bend6 Reln Nrep Zfp536 Dact1 Cd24a Hes5 Tsku Gas1 Yap1 Socs3 Vsnl1 Ccl19 Fndc5 Col1a1 Axl Klf4 Sst Crabp2 Kit Agrp Trh Fbln1 Hfe Bmp7 Gata2 Lrrk1 Abca1 Nfe2l2 Lbp Crhr1 Cxcl16 Calm3 Cdc37 Rcn3 Esr1 Arfgef3 Dcn Ctgf…
4.36711e-24	274	3182	Regulation of signaling	Lmx1a Notch1 Flna Sox9 Htra1 Rspo3 Prl Crhbp Bmp4 Ajuba Myc Twsg1 Syt7 Adam8 Snca Col3a1 Mal Ecm1 Reck Pxn Adgra2 Sfrp1 Thy1 Trf Sox10 Mif Twist1 Apln Nov Tob1 Sema7a Sesn1 Higd1a Nbl1 Bend6 Reln Nrep Zfp536 Dact1 Cd24a Hes5 Tsku Gas1 Yap1 Socs3 Vsnl1 Ccl19 Fndc5 Col1a1 Axl Klf4 Sst Crabp2 Kit Agrp Trh Fbln1 Hfe Bmp7 Gata2 Lrrk1 Abca1 Nfe2l2 Lbp Crhr1 Cxcl16 Calm3 Cdc37 Rcn3 Esr1 Arfgef3 Dcn Ctgf…
5.87065e-24	349	4487	Negative regulation of cellular process	Hfe Tigar Sox9 Lgals9 Col1a1 Chordc1 Klf4 Klf5 Mef2c Htra1 Id3 Bmp7 Gata2 Id2 Nr1d1 Per1 Ryr2 Id4 Thrb Bmp4 Hr Ednrb Ajuba Myc Bcl6 Zbtb20 Tra2b Nr4a1 Sik1 Twsg1 Esrra Adam8 Ifitm3 Gsn Notch1 Fbn1 Mdk Ecm1 Trp53inp1 Lmo4 Nr4a3 Per3 Nr2f2 Sfrp1 Mt1 Thy1 Sox10 Mif Jdp2 Inpp5j Plk5 Abca7 Twist1 Wnt4 Apln Nov Klf10 Tob1 Cdkn1c Sesn1 Higd1a Foxq1 Egr1 Six3 Prdm16 Olig2 Timeless Pacsin1 Nbl1 Mdfic Bend…
8.13533e-24	170	1574	Neurogenesis	Lmx1a Crabp2 Mef2c Bmp7 Vtn Socs2 Bmp4 Ednrb Bcl6 Tnfrsf12a Fn1 Nr4a2 Olfm1 Notch1 Lmo4 Nr2f2 Sfrp1 Drd2 Lama1 Barhl2 Inpp5j Plk5 Sema7a Six3 Bmp6 Nrn1 Prdm16 Olig2 Nbl1 Reln Zfp536 Slitrk6 Cd24a Hes5 Sema5b Lamb2 Chn1 H2-K1 Cxcl12 Prdm12 Cdh1 Mmp14 Kit Id3 Cdh23 Gata2 Nfe2l2 Cntnap1 Lama2 Nefh Btg2 Gh Gfap Nefm Nefl Myc Anxa1 Bhlhe22 Rgs2 Syt2 Myoc Gsn Snph Serpini1 Pitx2 Tnc Npy Ptn Ret Cpne9 I…
1.74691e-23	172	1614	Locomotion	Myo10 Lgals9 Sst Bmp7 Cxcl16 Ctgf Ajuba Tnfrsf12a Vegfa Cd74 Anxa1 Adam8 Cyr61 Lmo4 Spp1 Nr2f2 Adgra2 Trf Nbl1 Cxcl12 Ccl19 Cdh1 Sox9 Mmp14 Col1a1 Klf4 Mef2c Kit Fbln1 Gata2 Nfe2l2 Vtn Lama4 Lama2 Dcn Adarb1 Cygb Chga Bmp4 Ednrb Dab2 Myc Cacna1i Apod Cxadr Adamts1 Smoc2 Dusp1 Pdgfrb Igfbp5 Fn1 Lamc1 Myoc Col5a1 Notch1 Frmd5 Mdk Edn3 Nr4a3 Reck Podn Emilin1 Anxa3 Pxn Ephb4 Ptn Ret Arhgdib Iqgap1 P…
2.47866e-23	184	1795	Regulation of cell differentiation	Lmx1a Sox9 Fndc5 Klf4 Crabp2 Mef2c Bmp7 Gata2 Socs2 Fos Bmp4 Ednrb Bcl6 Tnfrsf12a Vegfa Sik1 Twsg1 Adam8 Fn1 Olfm1 Notch1 Fbn1 Cyr61 Sfrp1 Drd2 Jdp2 Inpp5j Plk5 Twist1 H2-Aa Sema7a Six3 Bmp6 Olig2 Nbl1 Reln Mustn1 Asb4 Zfp536 Insig1 Cd24a Hes5 Msx1 Six1 Junb Yap1 Socs3 Chn1 H2-K1 Zbtb16 Cebpd Ccl19 Col1a1 Axl Kit Fbln1 Nfe2l2 Ctgf Efemp1 Gh Alox8 Gfap Sfrp4 Dab2 Myc Xdh Cd74 Anxa1 Esrra Rgs2 Syt2…
2.50199e-23	161	1463	Generation of neurons	Lmx1a Crabp2 Mef2c Bmp7 Socs2 Bmp4 Ednrb Bcl6 Tnfrsf12a Fn1 Nr4a2 Olfm1 Notch1 Lmo4 Nr2f2 Sfrp1 Drd2 Lama1 Barhl2 Inpp5j Plk5 Sema7a Six3 Bmp6 Nrn1 Olig2 Nbl1 Reln Zfp536 Slitrk6 Cd24a Hes5 Sema5b Lamb2 Chn1 H2-K1 Cxcl12 Cdh1 Kit Id3 Cdh23 Gata2 Nfe2l2 Cntnap1 Nefh Btg2 Gh Gfap Nefm Nefl Myc Rgs2 Syt2 Myoc Snph Serpini1 Pitx2 Tnc Npy Ptn Ret Cpne9 Iqgap1 Flna Tenm3 Fgfr1 Agt Thy1 Kank1 Sox10 Unc1…
2.71474e-23	131	1056	Circulatory system development	Notch1 Ctgf Bmp4 Tnfrsf12a Vegfa Adam8 Thy1 Twist1 Asb4 Yap1 Sox9 Mmp14 Col1a1 Klf4 Hif3a Mef2c Kit Bmp7 Gata2 Nfe2l2 Dcn Thbs2 Smoc2 Xdh Anxa1 Col3a1 Fn1 Rgs2 Ptpn14 Fbn1 Oxt Notch2 Ecm1 Reck Tgfbr3 Anxa3 Col1a2 Eln Ephb4 Ptn Nr2f2 Mfge8 Pik3c2a Adgra2 Cdh5 Agt Anxa2 Stra6 Loxl1 Nfatc1 Vav3 Npy1r Fgf1 Wnt4 Apln Nov Serpine1 Kcnk2 Rgs4 Anpep Thbs1 Fzd7 Stab1 Shc1 Shb Sox18 Fgfbp1 Foxc1 Ghsr Jun M…
3.0015e-23	296	3600	Regulation of response to stimulus	Cd74 Lmx1a Notch1 Sox9 Chordc1 Htra1 Rspo3 Prl Crhbp Bmp4 Ajuba Myc Twsg1 Adam8 Col3a1 Mal Ecm1 Reck Pxn Adgra2 Sfrp1 Thy1 Trf Sox10 Mif Twist1 Apln Tob1 Sema7a Sesn1 Higd1a Nbl1 Bend6 Reln Nrep Zfp536 Dact1 Cd24a Hes5 Tsku Gas1 Myh7 Yap1 Socs3 Vsnl1 H2-K1 Cxcl12 H2-Ab1 Ccl19 Fndc5 Col1a1 Axl Klf4 Sst Crabp2 Kit Agrp Trh Fbln1 Hfe Bmp7 Gata2 Lrrk1 Abca1 Nfe2l2 Lbp Mtmr4 Crhr1 Cxcl16 Calm3 Cdc37 R…
1.15742e-22	129	1047	Tube development	Bmp7 Ctgf Id2 Bmp4 Ednrb Tnfrsf12a Vegfa Adam8 Pxn Thy1 Wnt6 Fgf1 Wnt4 Asb4 Foxd1 Mmp14 Klf4 Hif3a Aldh1a2 Gata2 Nfe2l2 Dcn Sdc1 Gh Thbs2 Smoc2 Xdh Pdgfrb Anxa1 Fn1 Notch1 Ecm1 Tnc Anxa3 Ephb4 Ptn Mfge8 Pik3c2a Adgra2 Agt Anxa2 Stra6 Vav3 Apln Nov Serpine1 Anpep Thbs1 Stab1 Shc1 Dact1 Shb Gjb2 Sox18 Fgfbp1 Foxc1 Ghsr Cited1 Jun Klf2 Col8a2 Arhgap24 Lepr Sphk1 Nrxn3 Col8a1 Rnf213 Sox9 Sfrp1 Epcam …

## Sheet: KEGG_Cer_higher in primiparous
KEGG pathway analysis for genes INDUCED by reproductive experience (higher in PRIMIPAROUS)--CEREBELLUM
top 30 most significant terms; analysis done with Ensembl_IDs from Supplemental Table 2 lists
Enrichment FDR	Genes in list	Total genes	Functional Category	Genes
1.46306e-11	12	130	KEGG:mmu00190 Oxidative phosphorylation	Cox5a Cox7c mt-Co1 mt-Cytb mt-Nd1 mt-Nd2 mt-Nd3 mt-Nd4 mt-Nd4l mt-Nd5 mt-Nd6 Ndufab1
1.63865e-11	12	139	KEGG:mmu05012 Parkinson's disease	Cox5a Cox7c mt-Co1 mt-Cytb mt-Nd1 mt-Nd2 mt-Nd3 mt-Nd4 mt-Nd4l mt-Nd5 mt-Nd6 Ndufab1
1.54084e-07	9	144	KEGG:mmu04723 Retrograde endocannabinoid signaling	mt-Nd1 mt-Nd2 mt-Nd3 mt-Nd4 mt-Nd4l mt-Nd5 mt-Nd6 Gng11 Ndufab1
0.00277539	15	1302	KEGG:mmu01100 Metabolic pathways	Qdpr Cox5a Cox7c mt-Co1 mt-Cytb mt-Nd1 mt-Nd2 mt-Nd3 mt-Nd4 mt-Nd4l mt-Nd5 mt-Nd6 Ugt8a Rfk Ndufab1
0.00277539	4	78	KEGG:mmu04260 Cardiac muscle contraction	Cox5a Cox7c mt-Co1 mt-Cytb
0.00277539	5	147	KEGG:mmu04932 Non-alcoholic fatty liver disease (NAFLD)	Cox5a Cox7c mt-Co1 mt-Cytb Ndufab1
0.00447231	5	170	KEGG:mmu05010 Alzheimer's disease	Cox5a Cox7c mt-Co1 mt-Cytb Ndufab1
0.00598211	5	187	KEGG:mmu05016 Huntington's disease	Cox5a Cox7c mt-Co1 mt-Cytb Ndufab1
0.0248227	3	86	KEGG:mmu04610 Complement and coagulation cascades	C1qa C1qb Thbd
0.031111	3	100	KEGG:mmu04933 AGE-RAGE signaling pathway in diabetic complications	Col3a1 Col1a2 Thbd
0.031111	2	34	KEGG:mmu05020 Prion diseases	C1qa C1qb

## Sheet: GO_CER_HIGHER IN PRIMIPAROUS
GO (Biological Process) analysis for genes induced by reproductive experience (higher in primiparous)--CEREBELLUM
top 30 most significant terms; analysis done with Ensembl_IDs from Supplemental Table 2 lists
Enrichment FDR	Genes in list	Total genes	Functional Category	Genes
6.47419e-05	8	127	Electron transport chain	Cox7c Fdx1 mt-Nd2 mt-Co1 mt-Nd4 mt-Nd5 mt-Cytb mt-Nd4l
0.000253961	6	71	Oxidative phosphorylation	mt-Nd2 mt-Co1 mt-Nd4 mt-Nd5 mt-Cytb mt-Nd4l
0.000253961	31	2998	Response to organic substance	Fbxo32 Col3a1 Pdia3 Col1a2 Fdx1 Ctsh Rps2 Cebpb Rpl13a Sox1 Mmp14 Qdpr Skor1 Aqp4 Ndufa13 Lpar1 Eid2 Foxc1 Gas1 mt-Nd1 mt-Nd3 mt-Nd4 mt-Nd5 mt-Nd6 mt-Cytb Sox2 Thbd Mpc2 Serp1 B2m Nnat
0.000253961	5	45	ATP synthesis coupled electron transport	mt-Nd2 mt-Nd4 mt-Nd5 mt-Cytb mt-Nd4l
0.000253961	39	4400	System development	Metrn Irx3 Cck C1qb Lpar1 Mbp Foxc1 Cebpb Mmp14 Qdpr Bhlhe22 Col3a1 Wwtr1 Col1a2 Clic4 Eid2 Olig1 Gjb1 Il17d mt-Co1 mt-Nd4 mt-Cytb Nnat Sox2 Sox1 Tusc2 Id4 Fzd2 Gas1 B2m Hba-a2 Fabp7 Efhd1 Serp1 Ctsh Ugt8a Hopx Qk Rpl13a
0.000290053	17	1051	Oxidation-reduction process	Dio2 Qdpr Cox7c Pdia3 Ndufab1 Fdx1 Ndufa13 mt-Nd1 mt-Nd2 mt-Co1 mt-Nd3 mt-Nd4 mt-Nd5 mt-Nd6 mt-Cytb mt-Nd4l Cavin3
0.000843674	20	1579	Response to oxygen-containing compound	Fbxo32 Col3a1 Col1a2 Fdx1 Ctsh Cebpb Qdpr Ndufa13 Lpar1 Rps2 mt-Nd1 mt-Nd4 mt-Nd5 mt-Nd6 mt-Cytb Thbd Mpc2 Nnat Rpl13a Pdia3
0.000843674	40	4912	Multicellular organism development	Metrn Irx3 Cck C1qb Lpar1 Mbp Foxc1 Cebpb Mmp14 Qdpr Bhlhe22 Col3a1 Wwtr1 Col1a2 Plekhb1 Clic4 Eid2 Olig1 Gjb1 Il17d Fzd2 Hopx Qk mt-Co1 mt-Nd4 mt-Cytb Nnat Sox2 Sox1 Tusc2 Id4 Gas1 B2m Hba-a2 Fabp7 Efhd1 Serp1 Ctsh Ugt8a Rpl13a
0.000843674	24	2166	Nervous system development	Metrn Irx3 Cck Lpar1 Mbp Cebpb Mmp14 Bhlhe22 Olig1 mt-Co1 mt-Nd4 Nnat Sox2 Sox1 Id4 Fzd2 Gas1 B2m Fabp7 Col3a1 Efhd1 Ugt8a Foxc1 Qk
0.000843674	5	66	Respiratory electron transport chain	mt-Nd2 mt-Nd4 mt-Nd5 mt-Cytb mt-Nd4l
0.00182617	30	3273	Animal organ development	C1qb Foxc1 Cebpb Mmp14 Qdpr Col3a1 Wwtr1 Col1a2 Clic4 Lpar1 Eid2 Il17d mt-Co1 mt-Nd4 mt-Cytb Nnat Sox2 Irx3 Tusc2 Fzd2 Gas1 B2m Hba-a2 Fabp7 Id4 Serp1 Ctsh Hopx Rpl13a Sox1
0.00228339	20	1719	Homeostatic process	Irx3 Micu2 Aqp4 Pdia3 Ctsh Cck Sfxn5 Lpar1 Ube2s Hba-a2 Dio2 Mpc2 Wwtr1 Clic4 Trp53inp2 Foxc1 Cebpb B2m Rpl13a Fzd2
0.00281676	9	386	Generation of precursor metabolites and energy	Cox7c Fdx1 mt-Nd2 mt-Co1 mt-Nd4 mt-Nd5 mt-Cytb mt-Nd4l Cavin3
0.00282189	14	947	Animal organ morphogenesis	Cebpb Col1a2 Foxc1 Irx3 Mmp14 Fzd2 Gas1 Id4 Col3a1 Wwtr1 Serp1 Ctsh Rpl13a Sox1
0.00282189	6	151	Cellular respiration	mt-Nd2 mt-Co1 mt-Nd4 mt-Nd5 mt-Cytb mt-Nd4l
0.00346317	15	1106	Response to abiotic stimulus	Mmp14 Col3a1 Opn3 Cck Lpar1 Ier5 mt-Co1 mt-Nd3 mt-Nd4 mt-Nd5 mt-Cytb Chchd2 Thbd Dio2 Fbxo32
0.00346317	7	234	Energy derivation by oxidation of organic compounds	mt-Nd2 mt-Co1 mt-Nd4 mt-Nd5 mt-Cytb mt-Nd4l Cavin3
0.00346317	12	737	Head development	Lpar1 mt-Co1 mt-Nd4 Nnat Sox2 Mmp14 Fabp7 Id4 Col3a1 Foxc1 Gas1 Sox1
0.00402417	25	2647	Cellular response to chemical stimulus	Fbxo32 Col3a1 Pdia3 Col1a2 Fdx1 Rps2 Cebpb Rpl13a Sox1 Qdpr Skor1 Aqp4 Ctsh Ndufa13 Clic4 Lpar1 Eid2 Foxc1 Gas1 B2m mt-Nd3 Hba-a2 Chchd2 Mpc2 Serp1
0.00459309	18	1574	Neurogenesis	Metrn Irx3 Cck Lpar1 Cebpb Mmp14 Bhlhe22 Olig1 Id4 Fzd2 B2m Fabp7 Col3a1 Efhd1 Ugt8a Gas1 Sox1 Qk
0.0046446	13	896	Central nervous system development	Lpar1 Olig1 mt-Co1 mt-Nd4 Nnat Sox2 Id4 Fabp7 Col3a1 Foxc1 Gas1 Sox1 Qk
0.00514787	5	113	Cerebellum development	Lpar1 mt-Co1 mt-Nd4 Foxc1 Gas1
0.0055693	29	3429	Regulation of biological quality	Irx3 Lpar1 Dio2 Golga7 Micu2 Aqp4 Pdia3 Col1a2 Fdx1 Ctsh Cck Sfxn5 Mbp Ube2s Thbd Foxc1 Hba-a2 Tusc2 Mpc2 Wwtr1 Serp1 Clic4 Trp53inp2 Cebpb B2m Nnat Rpl13a Fzd2 Qk
0.00624252	11	691	Brain development	Lpar1 mt-Co1 mt-Nd4 Nnat Sox2 Fabp7 Id4 Col3a1 Foxc1 Gas1 Sox1
0.00624252	23	2436	Anatomical structure morphogenesis	Metrn Cck Lpar1 Cebpb Mmp14 Col1a2 Mbp Foxc1 Sox2 Irx3 Fzd2 Gas1 Id4 Col3a1 Wwtr1 Serp1 Ctsh Ugt8a Clic4 Hopx Qk Rpl13a Sox1
0.00624252	5	122	Metencephalon development	Lpar1 mt-Co1 mt-Nd4 Foxc1 Gas1
0.00648593	5	124	Myelination	Mbp Lpar1 Id4 Ugt8a Qk
0.00675077	5	127	Ensheathment of neurons	Mbp Lpar1 Id4 Ugt8a Qk
0.00675077	5	127	Axon ensheathment	Mbp Lpar1 Id4 Ugt8a Qk
0.00881945	6	211	ATP metabolic process	mt-Nd2 mt-Co1 mt-Nd4 mt-Nd5 mt-Cytb mt-Nd4l
